# 1 Cell cycle-associated expression patterns predict gene function in mycobacteria

2

3 Running title: Transcriptional compartmentalization of the *Mtb* cell cycle

4

5 Aditya C. Bandekar<sup>1</sup>, Sishir Subedi<sup>2</sup>, Thomas R. Ioerger<sup>2</sup>, Christopher M. Sassetti<sup>1\*</sup>

6

7 <sup>1</sup>Department of Microbiology and Physiological Systems, University of Massachusetts

8 Medical School, Worcester, MA, 01605, USA

9 <sup>2</sup>Department of Computer Science and Engineering, Texas A&M University, College Station,

10 TX, 77843, USA

11 \*Correspondence: [christopher.sassetti@umassmed.edu](mailto:christopher.sassetti@umassmed.edu)

12

## 13 Abstract

14 While the major events in prokaryotic cell cycle progression are likely to be coordinated  
15 with transcriptional and metabolic changes, these processes remain poorly characterized.

16 Unlike many rapidly-growing bacteria, DNA replication and cell division are temporally-  
17 resolved in mycobacteria, making these slow-growing organisms a potentially useful

18 system to investigate the prokaryotic cell cycle. To determine if cell-cycle dependent gene  
19 regulation occurs in mycobacteria, we characterized the temporal changes in the

20 transcriptome of synchronously replicating populations of *Mycobacterium tuberculosis*

21 (*Mtb*). We report that ~16% of genes display a sinusoidal expression pattern with a period

22 consistent with the cell cycle. During cytokinesis, the timing of gene induction could be

23 used to predict the timing of gene function, as mRNA abundance correlated with the order

24 in which proteins were recruited to the developing septum. Similarly, the expression  
25 pattern of primary metabolic genes could be used to predict the relative importance of  
26 these pathways for different cell cycle processes. Pyrimidine synthetic genes peaked during  
27 DNA replication and their depletion caused a filamentation phenotype that phenocopied  
28 defects in this process. In contrast, the IMP dehydrogenase *guaB2* dedicated to guanosine  
29 synthesis displayed the opposite expression pattern and its depletion perturbed septation.  
30 Together, these data imply obligate coordination between primary metabolism and cell  
31 division, and identify periodically regulated genes that can be related to specific cell  
32 biological functions.

33

## 34 **Introduction**

35 Much of prokaryotic cell biology has been elucidated under rapid-growth conditions in  
36 which chromosomal replication takes longer than the doubling time of the cell (Helmstetter  
37 and Cooper, 1968), (Cooper and Helmstetter, 1968). Under these conditions, the  
38 production of complete chromosomes for daughter cells is ensured via the simultaneous  
39 initiation of multiple rounds of DNA replication, and it is not possible for cells to temporally  
40 segregate DNA replication from cytokinesis as is seen in the eukaryotic cell cycle.  
41 However, this paradigm may not apply to many, if not most, of the bacteria in the  
42 environment. For example, *Caulobacter crescentus* exploits a specialized developmental  
43 program that produces distinct sessile and motile cells, which is associated with a strict cell  
44 cycle that segregates DNA replication from cytokinesis. More generally, most of the  
45 bacterial biomass in nutrient poor natural environments is likely to persist in slow-growing  
46 states (Gibson et al., 2018). When these conditions are modeled in nutrient-restricted

47 *Escherichia coli*, major cellular events become restricted into distinct cell cycle periods  
48 designated, “B”, “C”, and “D”; in which DNA replication is restricted to the C period. The B  
49 and D periods occupy the time before or after C, respectively, and are divided by  
50 cytokinesis (Kubitschek and Newman, 1978)(Skarstad et al., 1983). Similarly,  
51 mycobacteria are slow-growing organisms, with doubling times that range from 3 hours to  
52 several days, which appear to constitutively employ this type of segregated cell cycle.  
53 While an ordered cell cycle may be more common in prokaryotes than generally  
54 appreciated, it has only been investigated in a limited number of systems.  
55  
56 The prokaryotic cell cycle has been most thoroughly studied in the aquatic bacterium, *C.*  
57 *crescentus*, largely because it is possible to produce bacterial cultures in which cells are  
58 replicating synchronously with respect to the cell cycle. As a result, the only genome-wide  
59 transcriptional profiles of synchronously-replicating bacteria have been produced in this  
60 species. These studies identified periodic fluctuations in mRNA abundance that correlated  
61 with the cell cycle (Laub et al., 2000), (Fang et al., 2013) and led to the elucidation of a  
62 regulatory cascade that controls cell cycle progression and cellular differentiation that  
63 appears to be conserved in other alphaproteobacteria (Brilli et al., 2010). In addition to  
64 these regulators of cell cycle progression, 19% of the genome was found to be periodically  
65 expressed (Laub et al., 2000). These genes included those involved in primary metabolic  
66 processes that are not directly associated with cell cycle progression, suggesting that major  
67 cellular events, such as DNA replication and cytokinesis, may be coordinated with other  
68 aspects of cellular physiology. These apparent links between metabolism and cell cycle are  
69 consistent with a number of studies in model organisms, where metabolites such as

70 NADH(Zhang et al., 2018) and ATP (Yaginuma et al., 2015) oscillate according to the cell  
71 cycle in *E. coli*; and UDP-glucose levels coordinate cell division timing with nutrient  
72 availability in both *B. subtilis* (Weart et al., 2007) and *E. coli* (Hill et al., 2013). While these  
73 data indicate that cell cycle progression is likely coupled with some aspects of primary  
74 metabolism, it remains unclear how these processes interact and whether insights from  
75 transcriptional profiling in *C. crescentus* are generalizable are to more diverse bacteria.

76

77 We sought to extend these paradigms to mycobacteria, a genus that includes relatively  
78 rapid growing environmental organisms, such as *M. smegmatis*, and slower growing  
79 pathogenic species such as *M. tuberculosis* (Mtb) and *M. bovis*. The cell cycle has been  
80 extensively characterized in both fast- and slow-growing mycobacteria using single-cell  
81 analyses of strains engineered to express fluorescent markers of DNA replication and  
82 cytokinesis. These studies show that DNA replication occurs only once per cycle in the  
83 majority of cells, and re-initiation of replication before division occurs only rarely (Santi et  
84 al., 2013) (Santi and McKinney, 2015)(Trojanowski et al., 2015)(Logsdon et al., 2017)  
85 (Trojanowski et al., 2017). While the relative durations of the cell cycle phases can be  
86 influenced by the environment and stochastic factors such as birth length (Logsdon et al.,  
87 2017), the average duration of the B, C, and D periods in Mtb are generally in the range of  
88 6-8 hours, 9-12 hours, and D~6-9 hours, respectively (Logsdon and Aldridge, 2018).

89

90 These observations are consistent with studies of synchronously-replicating cultures of  
91 *Mtb*, which can be generated using a mutant strain that harbors a cold-sensitive (*cos*) allele  
92 of the DNA replication initiator DnaA (Nair et al., 2009). This *Mtbcos* strain is unable to

93 initiate a new round of DNA replication at 30°C. Upon release into the permissive  
94 temperature (37°C), cultures synchronously incorporate 5,6-<sup>3</sup>H-uracil into alkali stable  
95 DNA for 11 hours, consistent with the C period length observed in single cells. The ability  
96 to produce synchronously replicating cultures that recapitulate the behavior of single cells  
97 makes mycobacteria an attractive system to investigate cell cycle-associated  
98 transcriptional changes.

99

100 Using the *Mtbcos* strain, we determined the transcriptional profile of synchronously  
101 replicating cultures across the cell cycle, and report that 16% of the genome meets strict  
102 criteria for periodic gene expression. Only a small fraction of the periodically-regulated  
103 gene sets of *Mtb* and *C. crescentus* overlap, suggesting that the links between cell cycle and  
104 metabolism are species-specific. We demonstrate that mRNA expression patterns in *Mtb*  
105 reflect the time at which the encoded proteins are incorporated into the developing  
106 septum, suggesting that functional information can be inferred from the kinetics of gene  
107 expression. Using this framework, we discover an unanticipated functional specialization  
108 of distinct nucleotide anabolic pathways. These observations show that DNA replication  
109 and cytokinesis are coordinated with different primary metabolic pathways, expanding the  
110 processes that are associated with these essential cellular events.

111

## 112 **Results**

### 113 **DNA replication and cytokinesis are segregated in synchronously growing** 114 **populations of *Mtb***

115 We generated synchronously replicating cultures of *Mtb* using the temperature-sensitive  
116 *Mtbcos* strain (Nair et al., 2009). Chromosomal replication was uniformly inhibited by  
117 incubating this strain at 30°C for 36 hours. Upon shift to the permissive temperature  
118 (37°C), the optical density (Absorbance<sub>600</sub>) of both the *Mtbcos* mutant and a wild type  
119 control culture increased throughout a 54 hour time course, demonstrating that nutrients  
120 did not become limiting. While the control culture grew at a constant rate over this period,  
121 the *dnaAcos* strain showed a reproducible multiphasic growth pattern, an initial indication  
122 that cellular metabolism may be linked to cell cycle events (**Fig1A**).

123  
124 In order to estimate the efficiency of the synchronization and to delineate cell cycle periods,  
125 we collected cells every three hours and monitored chromosomal replication and  
126 cytokinesis. The phosphothreonine-binding protein, FhaA, marks sites of division (Gee et  
127 al., 2012), and we used a fluorescent allele of this protein to calculate a “septation index”  
128 that corresponded to the fraction of cells with FhaA localization at midcell. While the  
129 septation index of a control culture of asynchronous cells (*MtbRv*) was constant throughout  
130 the time course, this metric varied in a periodic manner in the *Mtbcos* strain. The majority  
131 of cells arrested at the non-permissive temperature had an FhaA focus at midcell, which is  
132 likely an artifact of the DnaA inactivation. The septation index of *Mtbcos* cells quickly  
133 decreased upon shift to the permissive temperature, falling below the index of  
134 unsynchronized cultures by 12 hours. Septation reached a peak in the synchronized  
135 cultures between 27 and 33 hours after release, marking the cytokinesis phase of the cell  
136 cycle (**Fig1B**).

137

138 To monitor chromosomal replication, we devised a quantitative PCR assay to quantify the  
139 relative abundance of DNA at the origin (ori) and terminus (ter) of replication. Upon  
140 initiation of replication, the cell will have an ori:ter ratio of 2:1, and this ratio should be  
141 maintained until the terminus is duplicated. As we observed for septation index, the ori:ter  
142 ratio remained constant in unsynchronized cultures. In contrast, the ori:ter ratio peaked  
143 twice in the synchronized cultures (**Fig 1C**). The first peak lasted for a duration of  
144 approximately 12 hours (between 15h-27h post release) and second one lasted between  
145 48-hrs post release and the end of the study. Based on these data, we estimate that our  
146 time course captured approximately 1.5 cell cycles. Both the septation index and ori/ter  
147 ratio varied by approximately 50% of the range expected of fully synchronized cells,  
148 indicating that the synchrony of our cultures was incomplete. Regardless, these  
149 observations indicated that DNA replication is temporally segregated from cytokinesis, and  
150 the cultures were sufficiently synchronized to perform transcriptional profiling.

151

152

### 153 **Periodic gene expression correlates with cell cycle progression**

154 In order to investigate whether gene expression changes are associated with major cellular  
155 events like DNA replication and cytokinesis, we profiled mRNA abundance in synchronized  
156 cultures every 3 hours across a 54 hour time course. After normalization and scaling, we  
157 first assessed correlation patterns in the dataset. The initial time point after temperature  
158 shift to 37°C (0hr) was uncorrelated with the rest of the datasets, presumably due to an  
159 adjustment to the temperature shift and was omitted from subsequent analyses. For the  
160 remaining data, we found the highest degree of correlation between adjacent time points,

161 as expected for a time-resolved dataset (**Fig 2A**). While this was generally true for both the  
162 synchronized *Mtbcos* and unsynchronized *MtbRv* strains, the correlation matrix from the  
163 *Mtbcos* cultures displayed a distinct three-block structure suggesting the presence of  
164 transcriptionally distinct phases. This structure is even more apparent upon hierarchical  
165 clustering, which revealed a pattern of gene expression consistent with an ordered  
166 progression of events throughout the time course (**FigS1A**).

167  
168 To take advantage of both replicate measurements and the relatedness of adjacent time  
169 points, we used a Gaussian Process (GP) smoothing approach to estimate relative  
170 expression levels of each gene across the time course (**Fig S1B**). The expression of many  
171 genes with known cell-cycle related functions were found to peak during the appropriate  
172 period. For example, genes that are important for cell division, such as the regulator, *mtrA*  
173 (Plocinska et al., 2012) or the septal components, *sepF* (Gola et al., 2015) and *sepIVA* (Wu et  
174 al., 2018), peak in expression once during cytokinesis. Similarly, genes important for DNA  
175 replication, such as those encoding DNA primase (*dnaG*) and the replicative polymerase  
176 (*polA*) display two expression peaks during this time course, corresponding to DNA  
177 replication (**Fig2B**). In addition, we found that the expression pattern of several primary  
178 metabolic pathways mirrored these cell-cycle related genes, and suggested alterations in  
179 metabolic flux. For example, genes necessary for arginine biosynthesis were co-regulated  
180 and had opposing expression patterns to genes involved in arginine catabolism (**Fig2B**).

181  
182 We sought to more formally define genes with an expression pattern consistent with cell  
183 cycle progression. First, we removed genes with correlated expression patterns in



184 synchronized and unsynchronized cultures to minimize the effect of changes in culture  
185 conditions during the time course. Next, we fit the gaussian smoothed values for each gene  
186 to a sinusoidal function with the expected period of the *Mtb* cell cycle, optimizing the  
187 parameters for trend, amplitude, period and phase. Genes with a period outside the range  
188 of reasonable expectations based on the *Mtb* cell cycle were filtered out, along with genes  
189 with low overall expression or high variance between replicates. A goodness-of-fit criterion  
190 based on curve fitting residuals was applied, which maximized the difference in genes  
191 discovered in synchronized versus unsynchronized cultures. These criteria produced a 2.5-  
192 fold enrichment in genes discovered in the synchronized data set, and 617 genes were  
193 categorized as periodically expressed (**Fig 2C; Supplementary Table 2**). This gene set  
194 represented all major functional categories (**Fig2D**).

195

196 Clustering this set of periodically-regulated genes further highlighted the association  
197 between gene function and cell cycle stage. Genes were distributed into 18 clusters using  
198 hierarchical clustering of the *Mtbcos* expression profiles (**FigS2**), producing groups of  
199 coordinately regulated genes with peak expression values ranging across the time course.  
200 Eight of these clusters reflected expression profiles that peak during DNA replication  
201 (**Fig2E**). In these clusters, we find 18 genes (parA, mtr, Rv1341, pyrF, dgt, Rv2927c, rnhB,  
202 dnaG, ruvB, hpt, pyrH, deaD, mfd, polA, mrp, uvrD1, helY and mesJ) with defined roles in  
203 DNA replication, repair or biogenesis, further indicating that expression patterns were  
204 consistent with gene function.

205

206 The periodically regulated gene set (617 genes) in *Mtb* represents 16% of the genome,  
207 which is a similar fraction as the 19% of the *C crescentus* genome previously found to be  
208 cell cycle associated (Laub et al., 2000)(Fang et al., 2013). In order to investigate whether  
209 similar cellular functions are periodically regulated in these phylogenetically diverse  
210 organisms, we compared the expression patterns of orthologous genes. Out of the 880  
211 mutual orthologs identified as being reciprocal best BLAST matches, 231 genes were  
212 defined as cell cycle regulated in *C. crescentus* by virtue of being differentially expressed  
213 over time in synchronized cultures (Fang et al., 2013) and we found 176 to be periodically  
214 expressed in *Mtb* with an overlap of 36 genes (**Fig2F, Supplementary Table 3**). This  
215 overlap between the two gene sets was greater than what would be expected from random  
216 gene sets of the same size ( $p < 0.03$ ) and contains a number of genes with known cell cycle  
217 associated functions, such as the DNA replication initiator, *dnaA*, the ClpXP degradation  
218 system that controls cell cycle progression in *Caulobacter* via CtrA degradation (Jenal and  
219 Fuchs, 1998) (Vass et al., 2016), nucleotide metabolism (*dgt*, *thyA*) and DNA integrity  
220 (*uvrD*). However, the modest degree of overlap also suggests that independent sets of  
221 genes are periodically expressed in these two phylogenetically distinct organisms.

222

### 223 **mRNA abundance predicts the order of assembly of mycobacterial divisome** 224 **components and regulators**

225 The order in which large multicomponent structures, such as the flagellum, are assembled  
226 in bacteria can be predicted based on the transcriptional regulation of the corresponding  
227 genes (Kalir et al., 2001). Based on this “just in time” transcription model (Zaslaver et al.,  
228 2004), we hypothesized that the assembly of the large complex of proteins necessary for

229 cell division, aka the “divisome”, may follow the same principles and provide a model to  
230 test whether mRNA abundance could be used to predict the timing of gene function in our  
231 system. To test this model, we assessed the temporal coincidence between mRNA  
232 abundance and protein localization at the developing and maturing septum.

233

234 To broadly identify genes that are induced during cytokinesis (27-33h), we identified genes  
235 that only peak once in the time course (**Supplementary Table 1**) and clustered genes  
236 based on similar expression patterns (**Fig3A**). Within the clusters that peak in expression  
237 at the appropriate times, we found a number of genes known to be involved in cytokinesis  
238 (**Fig3A**). The first to be induced was *ftsZ*, the tubulin-like nucleator of the septum, and the  
239 septally-localized Ser/Thr kinase, *pknD*. This was followed by the expression of genes  
240 encoding several divisome-associated proteins, FtsW, SepIVA, and LamA. After these, we  
241 found the gene encoding the new pole landmark protein, DivIVA, was induced. To  
242 determine if the timing of expression predicted the order of assembly, we chose three  
243 genes, *pknD*, *ftsW* and *divIVA* which peaked in expression early, in the middle, and late  
244 during the cytokinesis window, respectively. Pairs of these proteins were fused with  
245 fluorescent tags and their cellular location was determined by time lapse microscopy in *M*  
246 *smegmatis*, a related mycobacterial species that expresses orthologs of these proteins and  
247 is a more experimentally tractable model of mycobacterial division (Kieser and Rubin,  
248 2014). Dual-color fluorescence imaging revealed that PknD, FtsW, and DivIVA appear at  
249 the developing septum in the order predicted by mRNA abundance (**Fig 3B-D**). Although  
250 not directly addressed in our experiments, it is likely that order of localization at the  
251 septum is independent of transcriptional regulation because PknD, and DivIVA fusion

252 proteins were expressed from constitutive promoters. Instead, the transcriptional order  
253 correlates with assembly, which appears to be dictated at the posttranscriptional level.

254

## 255 **Guanosine synthesis influences cytokinesis in mycobacteria**

256 Having demonstrated that gene expression can predict the timing of gene function, at least  
257 in the case of the developing septum, we investigated whether obligate coordination exists  
258 between cellular events, such as DNA replication and cytokinesis, and upstream pathways  
259 that produce the precursors for these processes. In particular, we focused on nucleotide  
260 metabolism by analyzing the expression patterns of enzymes catalyzing anabolic reactions  
261 beginning from the tricarboxylic acid cycle precursor, glutamate to the final nucleos(t)ide  
262 products. Pyrimidine biogenesis from the very early stages of the *carAB*-encoded reactions  
263 down to the *pyrBCDEF*-encoded reactions were most highly expressed during the C phase  
264 (at ~12 hours and ~48 hours), consistent with previous reports of an increased production  
265 of thymine nucleotides during DNA replication in *E coli* (Lark, 1961). This also  
266 corroborates reports of nucleotide pool sizes in *E coli* being insufficient for chromosome  
267 replication and requiring *de novo* synthesis before the onset of the DNA replication phase  
268 (Huzyk and Clark, 1971). Unexpectedly, the converse expression pattern was observed for  
269 the first reaction unique to guanosine synthesis, peaking at ~21hours. While both  
270 adenosine and guanosine purine rings are synthesized from the common precursor inosine  
271 monophosphate (IMP), the IMP dehydrogenase *GuaB2* catalyses the *first* dedicated reaction  
272 unique to GMP synthesis. *guaB2* peaked in expression during cytokinesis (**Fig4A**). Genes  
273 dedicated to synthesizing adenosine from IMP, *purB* and *amk*, did not appear to be cell  
274 cycle regulated.

275

276 The reciprocal expression patterns of pyrimidine and guanosine synthetic genes suggested  
277 that the requirement for these metabolites varied across the cell cycle and these  
278 requirements were associated with distinct cellular events. To investigate this hypothesis,  
279 we generated mutant *Mtb* strains in which synthesis of pyrimidines or guanosine was  
280 inhibited via the inducible genetic depletion of the PyrE or GuaB2 proteins, respectively.  
281 Each gene was fused to a C-terminal DAS+4 tag (DAS) that facilitated Clp protease-  
282 mediated degradation upon removal of anhydrotetracycline (aTc). In both cases, protein  
283 depletion inhibited bacterial growth (**Fig4B**), consistent with the essentiality of these  
284 pathways (DeJesus et al., 2017). As *Mtb* expresses three GuaB paralogs, we verified that  
285 GuaB2 is essential for guanosine synthesis by supplementing the *guaB2-DAS* strain with  
286 200uM guanine or guanosine. Consistent with previous studies (Singh et al., 2017),  
287 guanine partially rescued the growth defect of the depleted strain, whereas guanosine  
288 supplementation led to complete rescue (**Fig4C**).

289

290 The inverse expression patterns of *pyr* genes and *guaB2* implied increased *de novo*  
291 synthesis of pyrimidine nucleotides and guanosine was required for DNA synthesis or  
292 cytokinesis, respectively. To test this hypothesis, we used morphological criteria to infer  
293 which cellular process were primarily impacted by the inhibition of these nucleotide  
294 synthetic pathways. PyrE depletion resulted in cell elongation before growth arrest. The  
295 mean cell length increased from 3.3uM to 4.2uM upon PyrE depletion (**Fig4D**). This  
296 phenotype was similar to DNA gyrase GyrB depletion and cells treated with the gyrase  
297 inhibiting fluoroquinolone, moxifloxacin (**Fig4D**), which disrupts DNA replication and

298 causes cell filamentation in *E coli* (Diver and Wise, 1986). In contrast, GuaB2-depleted cells  
299 were the same length as wild type, but many of the growth arrested cells had bulges at  
300 midcell or one pole, suggesting that GuaB2 depletion may influence cell division **(Fig4D)**.  
301 To determine if these bulges represented misshapen septa leading to aberrant cytokinesis,  
302 we performed time-lapse microscopy in *M. smegmatis* cells treated with a specific chemical  
303 inhibitor of GuaB2 (VCC234718). Similar to genetic depletion, chemical inhibition of the  
304 GuaB2 enzyme also inhibited growth and produced bulges at midcell or one pole **(Fig4E)**.  
305 Time-lapse microscopy revealed that cells began to bulge at midcell by the completion of 1-  
306 2 cell cycles after the initiation of VCC234718 treatment, and that misshapen poles were  
307 derived from these bulges. Taken together, these observations imply that the cellular  
308 requirement for guanosine increases during cytokinesis, and that this requirement is  
309 reflected in the aberrant septation of guanosine-depleted cells.  
310  
311 FtsZ is among the most abundant proteins in the cell and this tubulin-like protein binds and  
312 hydrolyzes GTP (de Boer et al., 1992) as it undergoes the cycles of polymerization and  
313 depolymerization necessary for septation (Bisson-Filho et al., 2017). This GTP requirement  
314 suggested a possible mechanistic connection between guanosine nucleotide levels and  
315 septation. To investigate whether the effect of guanosine depletion on septation could be  
316 attributed to altered FtsZ dynamics, we determined the effect of inhibiting both processes  
317 simultaneously using the GuaB2 inhibitor VCC234718 and C109, an inhibitor of FtsZ  
318 GTPase activity and polymerization (Hogan et al., 2018). Consistent with the hypothesized  
319 mechanistic link, we observed significant antagonism between these compounds. Even at  
320 concentrations of VCC234718 that alone had no effect on growth (0.5 - 4uM), this

321 compound consistently increased the IC50 of C109 (**Fig4F**). In contrast, we found no  
322 interaction between VCC234718 and spectinomycin, an inhibitor of another major GTP  
323 consuming pathway, translation. C109, has previously been found to act additively with  
324 PCI90723, a compound that stabilizes the FtsZ filament. The opposite antagonistic  
325 interaction we observed between C109 and a GuaB2 inhibitor implies that guanosine  
326 inhibition inhibits polymerization, an effect that is consistent with the known GTP  
327 requirement for FtsZ polymerization.(de Boer et al., 1992), (Mukherjee and Lutkenhaus,  
328 1998). Taken together, these data are consistent with a model in which transcriptional  
329 induction of GuaB2 during cytokinesis coincides with the increased consumption of GTP by  
330 FtsZ, and the septal defects observed on guanosine depletion are related to defects in FtsZ  
331 dynamics.

332

### 333 **Discussion**

334 Previously, transcriptomic studies of the prokaryotic cell cycle have been limited to the *C.*  
335 *crescentus* model, due to the inability to generate robust synchronously replicating  
336 populations in other organisms. In this study, we leveraged a genetic strategy to  
337 synchronize *Mtb* cultures, and characterized cell cycle associated transcriptional changes in  
338 this organism. Comparisons between our *Mtb* studies and previously generated *C.*  
339 *crescentus* data are limited by a number of technical differences, including the method and  
340 degree of synchronization, that likely limited our ability to discern periodic patterns of  
341 relatively small amplitude in the *Mtb* dataset. Regardless, our findings are broadly  
342 comparable to observations in *C. crescentus*, as we found that a similar fraction of the  
343 genome is differentially expressed across the cell cycle in both systems, and a small but

344 significant fraction of orthologous genes are periodically-regulated in both. Despite these  
345 similarities, the majority of cell-cycle associated transcriptional changes (71% of *C.*  
346 *crenscentus* genes and 80% of *Mtb* genes) were unique to each organism. Thus, despite  
347 some similarities, our analysis indicates that cell cycle progression is associated with  
348 distinct transcriptional networks in these structurally and phylogenetically divergent  
349 organisms.

350

351 In a number of cases, we found that increases in mRNA abundance could be used to  
352 associate genes with temporally-resolved cell cycle events, such as septation. The  
353 sequential expression of divisome components as cell division progresses has been  
354 observed previously in *C. crescentus* (Laub et al., 2000). We provide functional evidence  
355 that this hierarchical expression pattern is associated with the order of divisome assembly  
356 in mycobacteria by demonstrating that the timing of gene induction correlates with the  
357 recruitment of the encoded proteins to the developing septum. Based on transcriptional  
358 data, we inferred the following order of assembly at the mycobacterial septum:

359 FtsZ>PknD>FtsW>LamA>SepIVA>DivIVA. The recruitment of these proteins spans  
360 sequential processes of divisome assembly and new pole biogenesis. FtsZ initially marks  
361 the future division site (Bi and Lutkenhaus, 1991), facilitating the recruitment of divisome  
362 components such as FtsW (Wang et al., 1998) and SepIVA (Wu et al., 2018). The arrival of  
363 LamA at the later stages of assembly is consistent with its role in delaying septation and  
364 thereby promoting asymmetric cell division(Rego et al., 2017). DivIVA is thought to be  
365 recruited to the negative curvature of the new pole after septation(Lenarcic et al.,  
366 2009)(Ramamurthi and Losick, 2009)(Meniche et al., 2014) and the segregation of



367 daughter cell cytoplasm (Santi et al., 2013). While these observations highlight that gene  
368 expression pattern can be used to predict the order of complex assembly, the outcome of  
369 this coordination remains unclear. As only a subset of currently known septal components  
370 were found to be periodically expressed, transcriptional regulation is unlikely to be the  
371 primary determinant of assembly order. Instead, this type of hierarchical gene expression  
372 has also been proposed as a mechanism to maximize efficiency by restricting protein  
373 expression to the period when it is needed (Kalir et al., 2001)(Zaslaver et al., 2004).  
374 Regulation of divisome assembly and function likely involves additional posttranslational  
375 mechanisms, as we found that the Ser/Thr kinase, PknD, is recruited relatively early in  
376 septal development and previous work described an important role for the Ser/Thr  
377 phosphatase, PstP, in cell division(Sharma et al., 2016), (Iswahyudi et al., 2019). While it  
378 remains possible that transcriptional regulation controls some aspects of septation, our  
379 data only show that expression pattern can predict the timing of gene function.

380  
381 The observed periodic expression of primary metabolic functions suggested the  
382 importance of coordinating cell cycle events with the upstream pathways that provide their  
383 precursors. This model is supported by our finding that pyrimidine synthetic genes peak  
384 during a distinct cell cycle period than the dedicated guanosine synthetic gene, GuaB2; and  
385 that the depletion of these genes primarily disrupts different cellular processes.

386 It is not surprising that the requirement for pyrimidines would increase during DNA  
387 synthesis, as *de novo* nucleotide synthesis is necessary to replicate the chromosome(Huzyk  
388 and Clark, 1971). However, the distinct cytokinesis defect observed upon GuaB2 depletion  
389 was unanticipated. Guanine nucleotides are important for a myriad of cellular processes,

390 including DNA replication, transcription, translation, and the biosynthesis of cofactors and  
391 polysaccharides. We speculate that the septation defect we observe upon GuaB2 depletion  
392 is related to the relatively low affinity of FtsZ for GTP. An accurate determination of  
393 nucleotide pool sizes in mycobacteria is still an open question (Warner et al., 2013), but in  
394 *E coli*, FtsZ has ~500-fold lower affinity for GTP than the DnaE1 replicative DNA  
395 polymerase ( $K_m \text{ FtsZ}_{\text{GTP}} = 1\text{mM}$ (Arjes et al., 2015) ;  $K_m \text{ DnaE1}_{\text{GTP}} = 2\mu\text{M}$ (Rock et al., 2015)).  
396 Furthermore, the reported intracellular concentration of GTP(Buckstein et al., 2008) would  
397 support only one-half of the  $V_{\text{max}}$  of FtsZ (Arjes et al., 2015). These data indicate that GTP  
398 levels may limit FtsZ dynamics. It is likely that GuaB2 depletion leads to aberrant FtsZ  
399 activity and not a loss of function, since genetic depletion of FtsZ leads to filamentation  
400 (Ehrt et al., 2005), a phenotype distinct from the one we observe upon GuaB2 depletion.  
401 Instead, alterations in FtsZ filament length or rate of turnover are likely to underly these  
402 defects.

403

404 Both DNA replication and cell division are essential processes that have been the focus of  
405 antibacterial drug discovery efforts(Warner et al., 2013)(Sass and Brötz-Oesterhelt, 2013).  
406 In most cases, these efforts focus on inhibiting a limited number of physical components of  
407 the bacterial replisome or divisome. Our transcriptional data identified a wide variety of  
408 genes that are coordinately expressed with the genes encoding these complexes, and  
409 therefore may be required for their activity. While we have only investigated these  
410 functional dependencies in the context of nucleotide synthesis, our data suggest that many  
411 similar dependencies exist and can be predicted from transcriptional profiles. If so, these

412 data could be used to identify a wealth of new strategies for inhibiting these specific  
413 essential cellular processes.

414

## 415 **Figure Legends**

### 416 **Figure 1: DNA replication and cytokinesis are segregated in synchronously growing** 417 **populations of *Mtb***

418 (A) Growth of *Mtbcos* (left) and *MtbRv* (right) after release into permissive temperature  
419 37°C. X axis: hours at 37°C. Y axis: Absorbance<sub>600</sub>

420 (B) FhaA septation index assay to determine cytokinesis phase. Percentage of *Mtbcos* (left)  
421 and *MtbRv* (right) populations containing an FhaA-venus focus localized at midcell after  
422 release into permissive temperature. Data points are representative of two biological  
423 replicates. Blue line is smoothed via the Gaussian process. The blue band indicates 95%  
424 confidence interval. Significant difference between *Mtbcos* and *MtbRv* curves was  
425 determined using a likelihood ratio test which determines if the data is fit best by a  
426 combined model (null hypothesis) or separate strain specific models (alternate  
427 hypothesis).  $\log_{\text{likelihood}}$  difference between combined and separate models = -38.489,  
428 p-value (chi-squared distribution; df=3) = 1.1e-16.

429 (C) Origin/terminus assay to determine the DNA replication phase. Relative ori/ter ratio of  
430 *Mtbcos* (left) and *MtbRv* (right) populations after release in permissive temperature. Data  
431 points are representative of two biological replicates. Blue line is smoothed via the  
432 Gaussian Process. The blue band indicates 95% confidence interval. Significant difference  
433 between *Mtbcos* and *MtbRv* curves was determined using a likelihood ratio test

434 (log\_likelihood difference between combined and separate models = -12.412, p-value (chi-  
435 squared distribution; df=3) = 1.679e-05.

436

437 **Figure 2: Periodic gene expression correlates with cell cycle progression**

438 (A) Correlation matrix of DESeq normalized counts for single replicates of *Mtbcos* (left) and  
439 *MtbRv* (right) for all 16 timepoints. (Blue: Pearson's correlation coefficient=0; Yellow:  
440 Pearson's correlation coefficient=1).

441 (B) Normalised DeSeq values of genes involved in DNA replication & cell division (top  
442 panel); arginine catabolism & anabolism (bottom panel).

443 (C) Hierarchical clustering of 617 periodically expressed genes in *Mtbcos* (Similarity  
444 metric: centered correlation, Clustering method: centroid linkage).

445 (D) Fraction of periodically expressed genes present in different Gene Ontology categories.

446 (E) Clusters containing periodic genes with expression patterns consistent with a role in  
447 DNA replication. Known DNA replication genes are listed in each cluster. X axis: hours post  
448 release into permissive temperature. Y axis: Normalised DESeq values

449 (F) Overlap between periodically expressed (*Mtbcos*) and differentially expressed (*C.*  
450 *crescentus*) mutual orthologs. Statistical significance of the overlap was determined using a  
451 hypergeometric test.  $p < 0.03$  for randomly drawing 36 genes in both organisms from the  
452 parent set of 880 genes.

453

454

455 **Figure 3: mRNA abundance predicts the order of assembly of mycobacterial divisome**  
456 **components and regulators**

457 (A) (Left) Clusters of *Mtbcos* genes with expression patterns that peak during the  
458 cytokinesis period. (Right) Scaled relative expression of known cytokinesis genes from  
459 these clusters.

460 (B) (Left) Scaled relative expression of PknD and DivIVA. (Right) Time-lapse imaging of *M*  
461 *smegmatis* expressing PknD-Venus (green) and DivIVA-RFP (red). Time (minutes) before  
462 the arrival of DivIVA at midcell is indicated.

463 (C) (Left) Scaled relative expression of FtsW and DivIVA. (Right) Time-lapse imaging of *M*  
464 *smegmatis* expressing FtsW-Venus (green) and DivIVA-RFP (red). Time (minutes) before  
465 the arrival of DivIVA at midcell is indicated.

466 (D) Time (minutes) between initial arrival of PknD (n=10), FtsW (n=7) and DivIVA at  
467 midcell. Error bars indicate mean  $\pm$  SD. Statistically significant difference between pknD  
468 and ftsW determined using an unpaired T-test ( $\alpha = 0.05$ ;  $p = 0.0023$ ). Statistically significant  
469 difference between ftsW and divIVA determined using a chi-squared test ( $\alpha = 0.05$ ;  $\chi^2 = 7$ ;  
470  $df = 1$ ;  $p < 0.01$ ).

471

#### 472 **Figure 4: Guanosine synthesis influences cytokinesis in mycobacteria**

473 (A) Relative expression of IMP dehydrogenase *guaB2* compared to pyrimidine biosynthesis  
474 genes *carA*, *carB*, *pyrB*, *pyrC*, *pyrD*, *pyrF*

475 (B) Cumulative growth (Absorbance<sub>600</sub>) of *M tuberculosis* *guaB-2DAS* (top), *gyrB-DAS*  
476 (center), *pyrE-DAS* (bottom) without depletion (solid line) and with depletion (dotted line).  
477 Arrows indicate the time during the pre-depletion period when cultures were back diluted  
478 into fresh growth medium. Data are represented as mean  $\pm$  SD of two biological replicates

479 (C) Growth (Absorbance<sub>600</sub>) of *M tuberculosis guaB2*-DAS ±depletion in the presence of  
480 either 200μM guanine or guanosine. Data are represented as mean ± SD of two biological  
481 replicates.

482 (D) *M tuberculosis* cellular phenotypes upon genetic depletion of GuaB2, PyrE, GyrB.  
483 Images were obtained after the cessation of growth in depleted cells. In the case of GuaB2,  
484 septal bulges (arrowheads) and polar bulges (arrows) are indicated. Histograms indicate  
485 the cell length distribution of cells in which the target was either not depleted (gray) or  
486 depleted (black). *Mtb* was treated with 0.2μM moxifloxacin for 24 hours and imaged.  
487 Histograms indicate the cell length distribution of cells in untreated (gray) or treated cells  
488 (black). MFD = Maximum Feret Diameter (1μM ~ 0.11MFD). Statistically significant/non-  
489 significant difference between the cell length distributions was determined using the  
490 Mann-Whitney test. ( $p_{\text{guaB2}}=0.214$ ;  $p_{\text{pyrE}}<0.001$ ;  $p_{\text{gyrB}}<0.001$ ;  $p_{\text{moxifloxacin}}<0.001$ )

491 (E) Time-lapse imaging at 20 minute intervals of GFP-expressing *M smegmatis* treated with  
492 2μM VCC234718.

493 (F) Left: Susceptibility of *M smegmatis* to VCC234718. Data are represented as mean ± SD  
494 Center: Cross titration assay on GFP-expressing *M smegmatis* with the indicated  
495 concentrations of VCC234718 and C109. Statistically significant difference between the  
496 VCC alone curve and other curves was determined using an extra-sum-of-squares F-test  
497 ( $\alpha=0.05$ ).  $p_{(\text{VCC } 0.5_{\mu\text{M}})}= 0.0215$ ;  $p_{(\text{VCC } 1_{\mu\text{M}})}= 0.0284$  ;  $p_{(\text{VCC } 2_{\mu\text{M}})}= 0.0001$  ;  $p_{(\text{VCC } 4_{\mu\text{M}})}= 0.0019$

498 Right: Cross titration assay on GFP-expressing *M smegmatis* with the indicated  
499 concentrations of VCC234718 and spectinomycin. The differences between the VCC alone  
500 curve and other curves were not significant, as determined using an extra-sum-of-squares

501 F-test ( $\alpha = 0.05$ ).  $p_{(VCC0.5,M)} = 0.9989$  ;  $p_{(VCC1,M)} = 0.9999$  ;  $p_{(VCC2,M)} = \text{ambiguous}$  ;  $p_{(VCC4,M)} =$   
502 0.9978

503

#### 504 **Supplemental figure legends**

505 FigS1A: Hierarchical clustering of significantly expressed genes in *Mtbcos* (log transformed  
506 DESeq normalized counts, centered around the mean, similarity metric: centered  
507 correlation, clustering method: centroid linkage). X axis: hours at 37°C.

508 FigS1B: Expression profile of the DNA polymerase *polA*. Data from two replicates (yellow  
509 and blue dashed lines) , GP fit (solid blue line) and sinusoidal fit (pink dotted line) are  
510 shown. Y axis: Normalised DESeq values. The DESeq value for each time point was  
511 normalized to the mean *polA* expression value across all time points.

512 FigS2: Eighteen Clusters containing the 617 periodic genes in *Mtbcos* (Distance matrix:  
513 Euclidean, Clustering method: Hierarchical). Heatmaps represent the expression patterns  
514 of the same genes in synchronized (*Mtbcos*) and unsynchronized (*MtbRv*) cultures.

515

#### 516 **Supplemental tables**

517 Table 1: Normalised DESeq2 values for all detected 2948 genes which were deemed to be  
518 significantly expressed. Each value represents the DESeq2 value normalized to the mean  
519 value of that gene across time. Genes determined to have one or two peaks in expression  
520 are indicated along with their peak cluster assignment.

521 Table 2: Normalised DESeq2 values for the 617 periodic genes. Each value represents the  
522 DESeq2 value normalized to the mean value of that gene across all time points. Periodic  
523 gene cluster ID is indicated.

524 Table3: List of overlapping periodically expressed *Mtb* (this study) and differentially  
525 expressed *C crescentus* (Fang et al., 2013) orthologs.

526

## 527 **Materials and Methods**

### 528 **Strains**

529 The *Mtbcos* strain was obtained from (Nair et al., 2009). *MtbRv* is the H37Rv strain used as  
530 an unsynchronized control. *Mtbcos* and *MtbRv* expressing FhaA m-venus were  
531 transformed with pKP887 (mycobacterial replicating plasmid MEH expressing MSMEG  
532 FhaA-Venus expressed from the MSMEG *fhaA* native promoter (from K.P. Sundaram). *M*  
533 *smegmatis* expressing ftsW-mVenus and divIVA-RFP was transformed with ptb21-ftsW-  
534 mVenus-MEK and tb21-divIVA-RFP-MCtH. *M smegmatis* expressing pknD-mVenus and  
535 DivIVA-RFP was transformed with p16-pknD-mVenus-MEK (Baer et al., 2014) and tb21-  
536 DivIVA-RFP-MCtH. *Mtb* hypomorphs used in this study were generated as part of an earlier  
537 study (Johnson et al., 2019) using a controlled protein degradation system described  
538 previously (Kim et al., 2011). Three strains were used in this study: *Mtb guaB2*-DAS-  
539 Hyg<sup>R</sup>+Giles-TetON1-sspB-str<sup>R</sup>; *Mtb gyrB*-DAS-Hyg<sup>R</sup>+Giles-TetON6-sspB-str<sup>R</sup>; *Mtb pyrE*-  
540 DAS-Hyg<sup>R</sup>+Giles-TetON1-sspB-str<sup>R</sup>. *M smegmatis* expressing green fluorescence contains  
541 the plasmid CT161 (m-Venus pMV261 Hyg<sup>R</sup>) obtained from the Eric Rubin Lab.

542

### 543 **Mtbcos synchronization**

544 Cultures of *MtbdnaAcos115* generated in a previous study (Nair et al., 2009), *MtbH37Rv*,  
545 *MtbdnaAcos115*-FhaA-Venus and *MtbH37Rv*-fhaA-Venus were grown in standard culture  
546 media at 37°C under shaking conditions till OD<sub>600</sub> 0.4. The cells were shifted to 30°C for 36



547 hours. The cultures were then shifted to 37°C and the cultures were processed for either  
548 DNA isolation, RNA isolation or fluorescent microscopy at the following times: 0h, 3h, 6.5h,  
549 9h, 12h, 18.5h, 21h, 27h, 31h, 33h, 36h, 39.5h, 42h, 45.5h, 52h and 55h.

550

### 551 **Chromosomal DNA isolation**

552 Chromosomal DNA was isolated from the cell pellet of 5ml culture from each timepoint.  
553 Briefly, 0.5 ml of chloroform:methanol (2:1) was added and the mixture was vortexed 5X  
554 1min. 0.5ml of phenol:chloroform was added and the mixture was vortexed for 30 seconds.  
555 Finally, 0.5ml of TE buffer was added. This was centrifuged at 12,000g at 4°C for 5 minutes.  
556 The upper phase was mixed with 1 volume of chloroform and vortexed. After  
557 centrifugation, the upper phase was added to a new tube and 1/10 volume of 3M sodium  
558 acetate and 1 volume of isopropanol was added. Precipitated DNA was spun out of solution  
559 and resuspended in 20ul of TE buffer.

560

### 561 **Origin:terminus assay**

562 Multiple primer sets (designed using the Primer3 design tool) amplifying 150bp at each  
563 location (Origin-0MB region surrounding Rv0001; Terminus -2.2MB region surrounding  
564 Rv1949c) of the *MtbH37Rv* genome were tested for amplification efficiency. Efficiency was  
565 calculated from the negative slope of the standard curve of  $C_T$  v/s template concentration.  
566 The primer sets with the highest and most similar efficiencies for both loci were selected  
567 (95% for the origin and 93% for the terminus). Quantitative PCR was done using SYBR  
568 green (Biorad iQ SYBR Green Supermix) with 2ng of gDNA template per reaction. Delta Ct  
569 values were calculated as  $dCt = C_{t_{ori}} - C_{t_{ter}}$ .  $2^{-dCt}$  values were then calculated for each

570 timepoint. These values were then divided by the mean  $2^{-dCt}$  across all timepoints to  
571 generate a relative ori/ter ratio for each timepoint.

572

573

## 574 **Microscopy**

### 575 Static imaging

576 At each time point post release into 37°C (Fig1B) or timepoint post genetic depletion of  
577 GyrB, GuaB2 and PyrE (Fig4D), 1ml of *Mtb* culture was centrifuged and cells were re-  
578 suspended in a phosphate buffered saline solution containing 0.05% Tween80 and 4%  
579 paraformaldehyde. These fixed cells were then placed onto an agarose pad and DIC (Fig4D)  
580 or wide field fluorescence imaging (Fig1B) was performed with a DeltaVision Personal DV  
581 microscope (GE Healthcare) using a 60X oil immersion objective (AP). Cell lengths in Fig4D  
582 were determined using CellProfiler™ (Carpenter et al., 2006) which calculates a MFD  
583 (Maximum Feret Diameter) which is a measurement of the largest number of pixels  
584 between the two ends of the cell obtained while rotating a caliper along all possible angles.  
585 The approximate conversion factor of MFD to microns is 0.11. Calculating an MFD is  
586 especially useful for measuring mycobacteria since all cells are not strict rods (cells  
587 undergo V-snapping prior to resolution of cytokinesis and daughter cell separation). The  
588 cell debris observed during GyrB depletion in Fig4D was excluded from cell length  
589 quantification by training CellProfiler using CP Analyst™.

### 590 Live cell imaging

591 10ul of cells in logarithmic phase ( $OD_{600}$  0.2-0.5) were spotted on a glass bottom 24-well  
592 plate (MatTek Corporation). 500ul of molten Luria Bertani medium (40-50C) was spread

593 over the cells and allowed to solidify. For experiments with VCC234718, molten LB  
594 containing 2uM final concentration of VCC234718 was prepared before layering over the  
595 cells. Time-resolved imaging was performed with a DeltaVision Personal DV wide field  
596 fluorescence microscope equipped with Ultimate Focus™ capabilities and an  
597 environmental chamber warmed to 37 °C (Applied Precision). Images were taken at 5 or 10  
598 minute intervals.

599

### 600 **RNA isolation, library preparation and sequencing**

601 At each timepoint, 45ml culture was pelleted and resuspended in 1ml of TRIzol  
602 (Invitrogen) and transferred to lysing matrix tubes (MP Biomedicals: Lysing Matrix B).  
603 Cells were lysed in a MP Biomedicals Fast Prep-24 homogenizer (maximum power-6.5, 4 X  
604 30s cycles, rest on ice for 5 minutes in between cycles). RNA was purified according to the  
605 manufacturer's directions. RNA cleanup was performed with Qiagen RNeasy Mini kit  
606 (74104) omitting the DNase step. Instead, after elution, in-tube DNase treatment was  
607 performed using Ambion DNase Turbo. RNeasy cleanup was repeated again with double  
608 volumes of RLT and ethanol. RNA was subjected to rRNA removal with Ribozero Bacteria  
609 kit (Illumina-MRZB12424). Deep sequencing library was prepared using KAPA Stranded  
610 RNASeq kit (KK8401). The RNAseq libraries were sequenced on an Illumina 2500  
611 instrument in paired-end mode, using a read-length of 150+150bp. The mean number of  
612 reads per sample was 8.9M (range 4.2-16.5M). The reads were mapped to the H37Rv  
613 genome using Burroughs Wheeler Alignment (Li and Durbin, 2009) with default parameter  
614 settings. Reads mapping to each ORF were totaled (sense strand only). Because certain  
615 loci were over-represented (e.g. rrs, rnpB, ssr, Rv3661, which had counts ~0.5-1M), counts

616 were truncated to a maximum coverage of 10,000 (reads/nt).

617

### 618 **Data normalization, filtering and centering**

619 The global expression profiles of *Mtbcos* samples showed a gradual increase in expression

620 of a few genes that dominate expression at latter time-points. Consequently, a

621 compensatory decrease was observed in expression of other genes, making normalization

622 by traditional reads per kilobase per million (RPKM) mis-representative. To correct for the

623 bias induced by these outliers, the normalization method implemented in DESeq2 (Love et

624 al., 2014) was used, which first normalizes counts by the geometric mean for each gene

625 across samples, and then scales each dataset to have a common median (which is less

626 sensitive to outliers). This was applied to all 64 datasets (2 strains X 2 replicates X 16 time-

627 points) in parallel. As a result, the expression patterns were well-calibrated between time-

628 points, with the medians matched.

629 To identify a subset of genes with meaningful expression, the average expression over all

630 time-points was calculated for each gene and divided by gene length (in nucleotides). 1070

631 genes out of 4018 with coverage<0.25 were dropped because expression patterns for

632 genes with low expression are inherently noisy, leaving 2948 genes with coverage>0.25.

633 (Supplementary Table 1). Additionally, we removed 127 genes out of 2948 genes whose

634 expression was >90% correlated between *Mtbcos* and *MtbRv* from subsequent analysis, as

635 their expression patterns were assumed to be determined more by time than by difference

636 in the strains. To center the expression values, the counts were divided by the mean for

637 that gene across all the time points. This was done independently for *Mtbcos* and *MtbRv*.

638

## 639 **Gaussian Process Smoothing**

640 In order to meaningfully integrate the data from the two replicates and to smooth out  
641 profiles over time, we used a Gaussian Process (GP) to fit the raw data (septation index and  
642 ori/ter – Fig1, gene expression- Fig2, Fig3, Fig4).

643 A GP model is a Bayesian model that estimates the probability distribution over functions  
644 using Gaussian distributions for likelihood functions. The advantage of a GP is that it is  
645 unbiased and therefore does not require assumptions of form of function. Instead, it only  
646 assumes that adjacent time points are better coupled than distant time points and that this  
647 correlation is based on Gaussian distributions.

648 A Gaussian Process is specified by a mean function and a covariance function

$$f(x) \sim GP(m(x), k(x, x'))$$

649 A prior mean  $m(x)=0$  and a covariance function, squared exponential is given as:

$$k(x, x') = \sigma^2 \exp\left(-\frac{1}{2} \sum_{i=1}^d \frac{(x_i - x'_i)^2}{l_i^2}\right)$$

650 where  $l^2$ = lengthscale,  $\sigma^2$  = variance,  $d$  = input dimension

651 We normalized the expression value  $e(g,t)$  (with addition of pseudocounts of 10) of each  
652 gene  $g$  at each time point  $t$  by dividing the mean across all time points, and then taking log  
653 base  $e$  transformation so that the normalized value  $e'(g,t)$  fluctuates with a mean of 0. The  
654 formula is given as:

$$e'(g, t) = \log_e e \frac{e(g, t)}{\sum_t e(g, t)}$$

655 Gaussian estimation of the expression levels for a gene at different time points, subject to  
656 noise is given as:

657 
$$y = f(x) + \varepsilon \text{ where: } \varepsilon \sim N(\mu, \sigma_n^2)$$

658 The predictive distribution for 15 test time points (~ 3 hour intervals, 3-55 hours),

659  $\{x_1, x_2, \dots, x_*\}$  is specified as:

$$p(f_* | x_*, x, y) = N(m(x_*), k(x_*))$$

660 where:

$$m(x_*) = k(x_*, x)^T (k(x, x) + \sigma^2 I)^{-1} y$$

$$k(x_*) = k(x_*, x_*) - k(x_*, x)^T (k(x, x) + \sigma^2 I)^{-1} k(x, x) + \sigma^2$$

661 We utilized the GPy Python package to fit the relative expression data (value for *cos1* and  
662 *cos2* simultaneously normalized by the mean expression level across all 60 time points for  
663 each gene using the following hyperparameters: variance = 1.0, noise variance = 0.1 and  
664 lengthscale (range 1 ~ 50) optimized to Maximum Likelihood Estimate (MLE) using a grid  
665 search method. After fitting the model, the predicted value (i.e. posterior mean) for each  
666 time point can be extracted. **Fig S1B** shows the GP regression obtained for *polA* (Rv 1629:  
667 DNA polymerase). Not only do the fitted values from the GP model generally interpolate  
668 between the observed data at each time point, they also present a smoother profile by  
669 averaging between adjacent time points to reduce noise. The error bands show the  
670 uncertainty in the model (95% confidence interval which can be denoted as  $\pm 1.96 * \Sigma$ ).

671 Where  $\Sigma$  is the estimated standard deviation at the X-coordinate from the model based on  
672 variance of the training data and surrounding points).

673

### 674 **Sinusoidal curve fitting**

675 The function implemented is written as:

676 
$$y = A \sin(\omega t + \Phi) + B + Ct$$

677 where:

678  $A$  = Amplitude;  $\omega$  = Frequency;  $B$  = Mean offset;  $\Phi$  = phase shift;  $Ct$  = a linear term to capture  
679 a net increasing or decreasing trend in the expression

680 This function was implemented in the `curve_fit()` function in Sci Py using non-linear least-  
681 squares as described in the Levenberg-Marquardt algorithm. 2758 genes fit the curve to  
682 varying degrees. We then used a threshold on the residual of the sinusoidal fit to select  
683 significantly periodic genes. This threshold was chosen to maximise the tradeoff of periodic  
684 genes in *Mtbcos* versus *MtbRv*. Below are the thresholds implemented and the number of  
685 positive attrition genes that passed each cutoff, applied sequentially:

686 Residual ( $<0.1$ ) : 918 genes

687 Amplitude ( $>0.15$ ) : 753 genes

688 Slope ( $<0.1$ ) : 631 genes

689 Period in range of 10-30 hours : 617 genes (Supplementary Table 2)

690

## 691 **Clustering**

692 Genes were clustered based on their expression profiles using hierarchical clustering  
693 (*hclust* in R), using the ward.D2 method (Jr, 1963) based on the Euclidean distance between  
694 the vectors of normalized expression values averaged between replicates over the 15 time  
695 points. The dendrogram was then divided into disjoint clusters using *cuttree*.

696

## 697 **Peak Assignment**

698 Using the GP fit data, we applied the following criteria to assign a peak to a gene's  
699 expression profile. The time series  $T$  with  $n$  observations for each gene with smoothed

700 expression values  $\{x_1, x_2, \dots, x_n\}$  at different time points  $\{t_1, t_2, \dots, t_n\}$  was defined as:

$$T = \{(t_1, x_1), (t_2, x_2), \dots, (t_n, x_n)\}$$

701 First, to screen out the increasing or decreasing trend at the beginning and end of the time  
702 series, and to focus on the cytokinesis phase in the middle of the time course, we excluded  
703 the first and last two time points from the peak assignment. Second, to identify well-spaced  
704 major peaks across time points, we defined a point  $x_i$  as a peak if it has a greater magnitude  
705 than its two nearest neighbors on both sides. This is defined as:

$$x_i > x_{i+1}, x_{i+2}, x_{i-1}, x_{i-2} \quad \forall i = 3, 4, \dots, n - 2$$

706 Furthermore, to filter out the genes with lower fluctuations, the difference between the  
707 magnitude of the highest peak  $x_h$  and the global minimum  $g_{min}$  was restricted to be greater  
708 than 0.5. Additionally, in the case of more than one peak in the time series, all the peaks  
709 were constrained to have at least a half magnitude of the highest peak in the expression  
710 profile. Finally, a set of peaks  $P$  for a time series was identified as:

$$P = \{(t_i, x_i) | (x_i > x_{i+1}, x_{i+2}, x_{i-1}, x_{i-2}) \wedge (x_i - g_{min} > 0.5) \wedge (x_i \geq 0.5 * x_h)\} \quad \forall i = 3, 4, \dots, n - 2$$

711 Among the significantly expressed genes, the peak assignment identified 1620 genes with a  
712 single peak and 71 genes with two peaks in the *Mtbcos* strain compared to 903 genes with a  
713 single peak and 8 genes with two peaks in *MtbRv*. Similarly, 1222 genes in the *cos* strain  
714 and 2344 genes in the wild type did not have any major peak. This once again confirmed  
715 that the gene expression levels in the *Mtbcos* strain show significantly higher fluctuations  
716 than *MtbRv*.

717

718 **References**



- 719 Arjes, H.A., Lai, B., Emelue, E., Steinbach, A., and Levin, P.A. (2015). Mutations in the bacterial  
720 cell division protein FtsZ highlight the role of GTP binding and longitudinal subunit interactions  
721 in assembly and function. *BMC Microbiol* *15*, 209.
- 722 Baer, C.E., Iavarone, A.T., Alber, T., and Sassetti, C.M. (2014). Biochemical and Spatial  
723 Coincidence in the Provisional Ser/Thr Protein Kinase Interaction Network of *Mycobacterium*  
724 *tuberculosis*. *J. Biol. Chem.* jbc.M114.559054.
- 725 Bi, E., and Lutkenhaus, J. (1991). FtsZ ring structure associated with division in *Escherichia coli*.  
726 *Nature* *354*, 161–164.
- 727 Bisson-Filho, A.W., Hsu, Y.-P., Squyres, G.R., Kuru, E., Wu, F., Jukes, C., Sun, Y., Dekker, C.,  
728 Holden, S., VanNieuwenhze, M.S., et al. (2017). Treadmilling by FtsZ filaments drives  
729 peptidoglycan synthesis and bacterial cell division. *Science* *355*, 739–743.
- 730 de Boer, P., Crossley, R., and Rothfield, L. (1992). The essential bacterial cell-division protein  
731 FtsZ is a GTPase. *Nature* *359*, 254–256.
- 732 Brilli, M., Fondi, M., Fani, R., Mengoni, A., Ferri, L., Bazzicalupo, M., and Biondi, E.G. (2010). The  
733 diversity and evolution of cell cycle regulation in alpha-proteobacteria: a comparative genomic  
734 analysis. *BMC Systems Biology* *4*, 52.
- 735 Buckstein, M.H., He, J., and Rubin, H. (2008). Characterization of Nucleotide Pools as a Function  
736 of Physiological State in *Escherichia coli*. *Journal of Bacteriology* *190*, 718–726.
- 737 Carpenter, A.E., Jones, T.R., Lamprecht, M.R., Clarke, C., Kang, I.H., Friman, O., Guertin, D.A.,  
738 Chang, J.H., Lindquist, R.A., Moffat, J., et al. (2006). CellProfiler: image analysis software for  
739 identifying and quantifying cell phenotypes. *Genome Biology* *7*, R100.
- 740 Cooper, S., and Helmstetter, C.E. (1968). Chromosome replication and the division cycle of  
741 *Escherichia coli* Br. *Journal of Molecular Biology* *31*, 519–540.
- 742 DeJesus, M.A., Gerrick, E.R., Xu, W., Park, S.W., Long, J.E., Boutte, C.C., Rubin, E.J.,  
743 Schnappinger, D., Ehrt, S., Fortune, S.M., et al. (2017). Comprehensive Essentiality Analysis of  
744 the *Mycobacterium tuberculosis* Genome via Saturating Transposon Mutagenesis. *MBio* *8*.
- 745 Diver, J.M., and Wise, R. (1986). Morphological and biochemical changes in *Escherichia coli*  
746 after exposure to ciprofloxacin. *J Antimicrob Chemother* *18*, 31–41.
- 747 Ehrt, S., Guo, X.V., Hickey, C.M., Ryou, M., Monteleone, M., Riley, L.W., and Schnappinger, D.  
748 (2005). Controlling gene expression in mycobacteria with anhydrotetracycline and Tet  
749 repressor. *Nucleic Acids Res* *33*, e21.
- 750 Fang, G., Passalacqua, K.D., Hocking, J., Llopis, P., Gerstein, M., Bergman, N.H., and Jacobs-  
751 Wagner, C. (2013). Transcriptomic and phylogenetic analysis of a bacterial cell cycle reveals  
752 strong associations between gene co-expression and evolution. *BMC Genomics* *14*, 450.

- 753 Gee, C.L., Papavinasasundaram, K.G., Blair, S.R., Baer, C.E., Falick, A.M., King, D.S., Griffin, J.E.,  
754 Venghatakrishnan, H., Zukauskas, A., Wei, J.-R., et al. (2012). A Phosphorylated Pseudokinase  
755 Complex Controls Cell Wall Synthesis in Mycobacteria. *Sci. Signal.* 5, ra7–ra7.
- 756 Gibson, B., Wilson, D.J., Feil, E., and Eyre-Walker, A. (2018). The distribution of bacterial  
757 doubling times in the wild. *Proc Biol Sci* 285.
- 758 Gola, S., Munder, T., Casonato, S., Manganelli, R., and Vicente, M. (2015). The essential role of  
759 SepF in mycobacterial division. *Molecular Microbiology* 97, 560–576.
- 760 Helmstetter, C.E., and Cooper, S. (1968). DNA synthesis during the division cycle of rapidly  
761 growing *Escherichia coli*. *Br. Journal of Molecular Biology* 31, 507–518.
- 762 Hill, N.S., Buske, P.J., Shi, Y., and Levin, P.A. (2013). A Moonlighting Enzyme Links *Escherichia*  
763 *coli* Cell Size with Central Metabolism. *PLoS Genet* 9, e1003663.
- 764 Hogan, A.M., Scoffone, V.C., Makarov, V., Gislason, A.S., Tesfu, H., Stietz, M.S., Brassinga, A.K.C.,  
765 Domaratzki, M., Li, X., Azzalin, A., et al. (2018). Competitive Fitness of Essential Gene  
766 Knockdowns Reveals a Broad-Spectrum Antibacterial Inhibitor of the Cell Division Protein FtsZ.  
767 *Antimicrob Agents Chemother* 62, e01231-18, /aac/62/12/e01231-18.atom.
- 768 Huzyk, L., and Clark, D.J. (1971). Nucleoside Triphosphate Pools in Synchronous Cultures of  
769 *Escherichia coli*. *Journal of Bacteriology* 108, 74–81.
- 770 Iswahyudi, Mukamolova, G.V., Straatman-Iwanowska, A.A., Allcock, N., Ajuh, P., Turapov, O.,  
771 and O’Hare, H.M. (2019). Mycobacterial phosphatase PstP regulates global serine threonine  
772 phosphorylation and cell division. *Sci Rep* 9, 8337.
- 773 Jenal, U., and Fuchs, T. (1998). An essential protease involved in bacterial cell-cycle control. *The*  
774 *EMBO Journal* 17, 5658–5669.
- 775 Johnson, E.O., LaVerriere, E., Office, E., Stanley, M., Meyer, E., Kawate, T., Gomez, J.E., Audette,  
776 R.E., Bandyopadhyay, N., Betancourt, N., et al. (2019). Large-scale chemical–genetics yields new  
777 *M. tuberculosis* inhibitor classes. *Nature* 571, 72–78.
- 778 Jr, J.H.W. (1963). Hierarchical Grouping to Optimize an Objective Function. *Journal of the*  
779 *American Statistical Association* 58, 236–244.
- 780 Kalir, S., McClure, J., Pabbaraju, K., Southward, C., Ronen, M., Leibler, S., Surette, M.G., and  
781 Alon, U. (2001). Ordering Genes in a Flagella Pathway by Analysis of Expression Kinetics from  
782 Living Bacteria. *Science* 292, 2080–2083.
- 783 Kieser, K.J., and Rubin, E.J. (2014). How sisters grow apart: mycobacterial growth and division.  
784 *Nat Rev Microbiol* 12, 550–562.

- 785 Kim, J.-H., Wei, J.-R., Wallach, J.B., Robbins, R.S., Rubin, E.J., and Schnappinger, D. (2011).  
786 Protein inactivation in mycobacteria by controlled proteolysis and its application to deplete the  
787 beta subunit of RNA polymerase. *Nucleic Acids Research* 39, 2210–2220.
- 788 Kubitschek', H.E., and NEWMANT, C.N. (1978). Chromosome Replication During the Division  
789 Cycle in Slowly Growing, Steady-State Cultures of Three Escherichia coli B/r Strains. *136*, 12.
- 790 Lark, K.G. (1961). Variation in bacterial acid-soluble deoxyribotides during discontinuous  
791 deoxyribonucleic acid synthesis. *Biochimica et Biophysica Acta* 51, 107–116.
- 792 Laub, M.T., McAdams, H.H., Feldblyum, T., Fraser, C.M., and Shapiro, L. (2000). Global Analysis  
793 of the Genetic Network Controlling a Bacterial Cell Cycle. *Science* 290, 2144–2148.
- 794 Lenarcic, R., Halbedel, S., Visser, L., Shaw, M., Wu, L.J., Errington, J., Marenduzzo, D., and  
795 Hamoen, L.W. (2009). Localisation of DivIVA by targeting to negatively curved membranes.  
796 *EMBO J* 28, 2272–2282.
- 797 Li, H., and Durbin, R. (2009). Fast and accurate short read alignment with Burrows–Wheeler  
798 transform. *Bioinformatics* 25, 1754–1760.
- 799 Logsdon, M.M., and Aldridge, B.B. (2018). Stable Regulation of Cell Cycle Events in  
800 Mycobacteria: Insights From Inherently Heterogeneous Bacterial Populations. *Front. Microbiol.*  
801 514.
- 802 Logsdon, M.M., Ho, P.-Y., Papavinasasundaram, K., Richardson, K., Cokol, M., Sasseti, C.M.,  
803 Amir, A., and Aldridge, B.B. (2017). A Parallel Adder Coordinates Mycobacterial Cell-Cycle  
804 Progression and Cell-Size Homeostasis in the Context of Asymmetric Growth and Organization.  
805 *Current Biology* 27, 3367-3374.e7.
- 806 Love, M.I., Huber, W., and Anders, S. (2014). Moderated estimation of fold change and  
807 dispersion for RNA-seq data with DESeq2. *Genome Biol* 15.
- 808 Meniche, X., Otten, R., Siegrist, M.S., Baer, C.E., Murphy, K.C., Bertozzi, C.R., and Sasseti, C.M.  
809 (2014). Subpolar addition of new cell wall is directed by DivIVA in mycobacteria. *PNAS* 111,  
810 E3243–E3251.
- 811 Mukherjee, A., and Lutkenhaus, J. (1998). Dynamic assembly of FtsZ regulated by GTP  
812 hydrolysis. *The EMBO Journal* 17, 462–469.
- 813 Nair, N., Dzedzic, R., Greendyke, R., Muniruzzaman, S., Rajagopalan, M., and Madiraju, M.V.  
814 (2009). Synchronous replication initiation in novel Mycobacterium tuberculosis dnaA cold-  
815 sensitive mutants. *Molecular Microbiology* 71, 291–304.
- 816 Plocinska, R., Purushotham, G., Sarva, K., Vadrevu, I.S., Pandeeti, E.V.P., Arora, N., Plocinski, P.,  
817 Madiraju, M.V., and Rajagopalan, M. (2012). Septal localization of the Mycobacterium

- 818 tuberculosis MtrB sensor kinase promotes MtrA regulon expression. *J. Biol. Chem.* **287**, 23887–  
819 23899.
- 820 Ramamurthi, K.S., and Losick, R. (2009). Negative membrane curvature as a cue for subcellular  
821 localization of a bacterial protein. *PNAS* **106**, 13541–13545.
- 822 Rego, E.H., Audette, R.E., and Rubin, E.J. (2017). Deletion of a mycobacterial divisome factor  
823 collapses single-cell phenotypic heterogeneity. *Nature* **546**, 153–157.
- 824 Rock, J.M., Lang, U.F., Chase, M.R., Ford, C.B., Gerrick, E.R., Gawande, R., Coscolla, M., Gagneux,  
825 S., Fortune, S.M., and Lamers, M.H. (2015). DNA replication fidelity in *Mycobacterium*  
826 tuberculosis is mediated by an ancestral prokaryotic proofreader. *Nat Genet* **47**, 677–681.
- 827 Santi, I., and McKinney, J.D. (2015). Chromosome Organization and Replisome Dynamics in  
828 *Mycobacterium smegmatis*. *MBio* **6**, e01999-14.
- 829 Santi, I., Dhar, N., Bousbaine, D., Wakamoto, Y., and McKinney, J.D. (2013). Single-cell dynamics  
830 of the chromosome replication and cell division cycles in mycobacteria. *Nat Commun* **4**, 2470.
- 831 Sass, P., and Brötz-Oesterhelt, H. (2013). Bacterial cell division as a target for new antibiotics.  
832 *Current Opinion in Microbiology* **16**, 522–530.
- 833 Sharma, A.K., Arora, D., Singh, L.K., Gangwal, A., Sajid, A., Molle, V., Singh, Y., and Nandicoori,  
834 V.K. (2016). Serine/Threonine Protein Phosphatase PstP of *Mycobacterium tuberculosis* Is  
835 Necessary for Accurate Cell Division and Survival of Pathogen. *J. Biol. Chem.* **291**, 24215–24230.
- 836 Singh, V., Donini, S., Pacitto, A., Sala, C., Hartkoorn, R.C., Dhar, N., Keri, G., Ascher, D.B.,  
837 Mondésert, G., Vocat, A., et al. (2017). The Inosine Monophosphate Dehydrogenase, GuaB2, Is  
838 a Vulnerable New Bactericidal Drug Target for Tuberculosis. *ACS Infect. Dis.* **3**, 5–17.
- 839 Skarstad, K., Steen, H.B., and Boye, E. (1983). Cell cycle parameters of slowly growing  
840 *Escherichia coli* B/r studied by flow cytometry. *J Bacteriol* **154**, 656–662.
- 841 Trojanowski, D., Ginda, K., Pióro, M., Hołówka, J., Skut, P., Jakimowicz, D., and Zakrzewska-  
842 Czerwińska, J. (2015). Choreography of the *Mycobacterium* Replication Machinery during the  
843 Cell Cycle. *MBio* **6**, e02125-14.
- 844 Trojanowski, D., Hołówka, J., Ginda, K., Jakimowicz, D., and Zakrzewska-Czerwińska, J. (2017).  
845 Multifork chromosome replication in slow-growing bacteria. *Sci Rep* **7**, 43836.
- 846 Vass, R.H., Zeinert, R.D., and Chien, P. (2016). Protease regulation and capacity during  
847 *Caulobacter* growth. *Current Opinion in Microbiology* **34**, 75–81.
- 848 Wang, L., Khattar, M.K., Donachie, W.D., and Lutkenhaus, J. (1998). FtsI and FtsW Are Localized  
849 to the Septum in *Escherichia coli*. *Journal of Bacteriology* **180**, 2810–2816.

- 850 Warner, D.F., Tønjum, T., and Mizrahi, V. (2013). DNA Metabolism in Mycobacterial  
851 Pathogenesis. *Curr. Top. Microbiol. Immunol.*
- 852 Weart, R.B., Lee, A.H., Chien, A.-C., Haeusser, D.P., Hill, N.S., and Levin, P.A. (2007). A Metabolic  
853 Sensor Governing Cell Size in Bacteria. *Cell* *130*, 335–347.
- 854 Wu, K.J., Zhang, J., Baranowski, C., Leung, V., Rego, E.H., Morita, Y.S., Rubin, E.J., and Boutte,  
855 C.C. (2018). Characterization of Conserved and Novel Septal Factors in *Mycobacterium*  
856 *smegmatis*. *Journal of Bacteriology* *200*.
- 857 Yaginuma, H., Kawai, S., Tabata, K.V., Tomiyama, K., Kakizuka, A., Komatsuzaki, T., Noji, H., and  
858 Imamura, H. (2015). Diversity in ATP concentrations in a single bacterial cell population  
859 revealed by quantitative single-cell imaging. *Sci Rep* *4*, 6522.
- 860 Zaslaver, A., Mayo, A.E., Rosenberg, R., Bashkin, P., Sberro, H., Tsalyuk, M., Surette, M.G., and  
861 Alon, U. (2004). Just-in-time transcription program in metabolic pathways. *Nat Genet* *36*, 486–  
862 491.
- 863 Zhang, Z., Miliadis-Argeitis, A., and Heinemann, M. (2018). Dynamic single-cell NAD(P)H  
864 measurement reveals oscillatory metabolism throughout the *E. coli* cell division cycle. *Sci Rep* *8*,  
865 2162.

866

867

## 868 **Acknowledgements**

869 We would like to thank Aashish Srivastava under the guidance of James Sacchettini and the  
870 Texas A&M Genomics and Bioinformatics Service for sequencing the RNASeq libraries.

871 VCC234718 was a generous gift from Vinayak Singh & Valerie Mizrahi. C109 was a  
872 generous gift from Vadim Makarov. Genetic depletion strains were generated as part of a  
873 larger collaborative effort including the labs of Deborah Hung, Eric Rubin, Sabine Ehrt and  
874 Dirk Schnappinger. Kenan Murphy and Charlotte Reames contributed to strain generation  
875 from the Sasseti lab. We would like to thank Megan Proulx for critical reading of the  
876 manuscript. This work was supported by grant AI095208 to CMS.

877

## 878 **Author contributions**

- 879 Conceptualization- ACB, TRI, CMS
- 880 Methodology- ACB, TRI
- 881 Investigation- ACB
- 882 Validation- ACB
- 883 Formal Analysis- ACB, SS, TRI
- 884 Writing Original Draft- ACB
- 885 Writing Review & Editing- ACB, TRI, CMS
- 886 Funding acquisition- CMS
- 887 Supervision- CMS
- 888
- 889 **Declaration of interests**
- 890 The authors declare no competing interests.

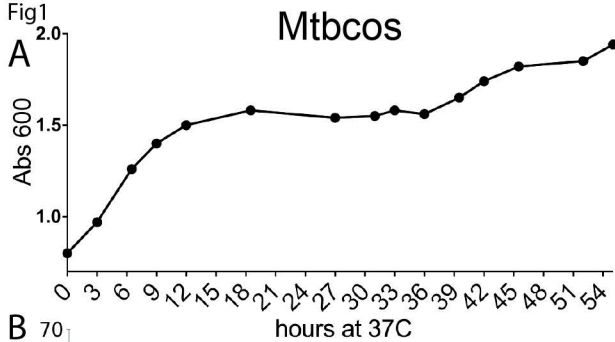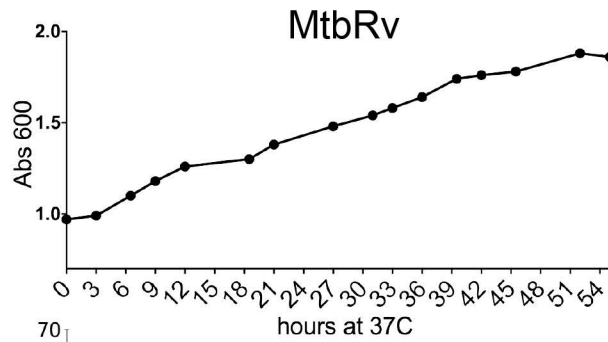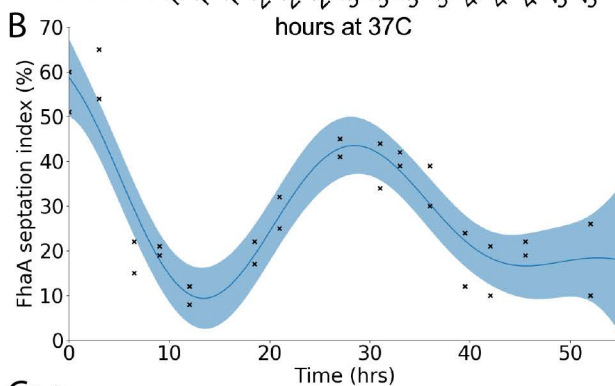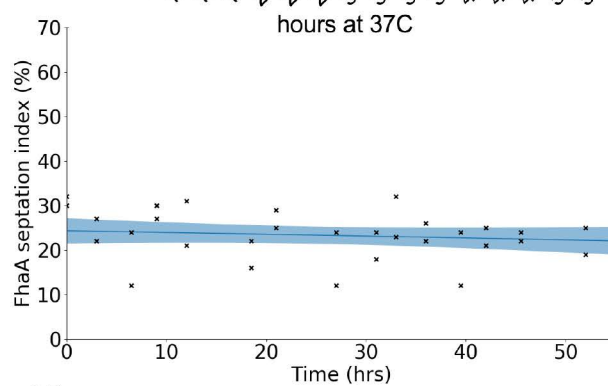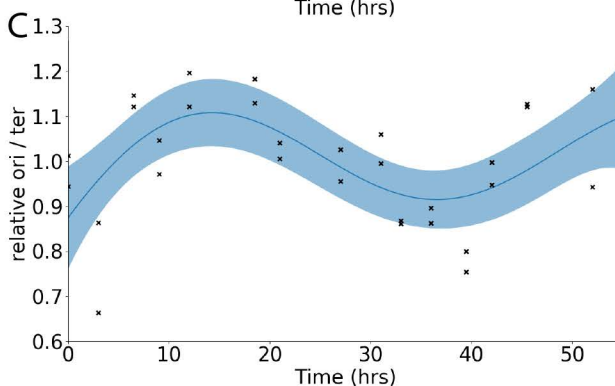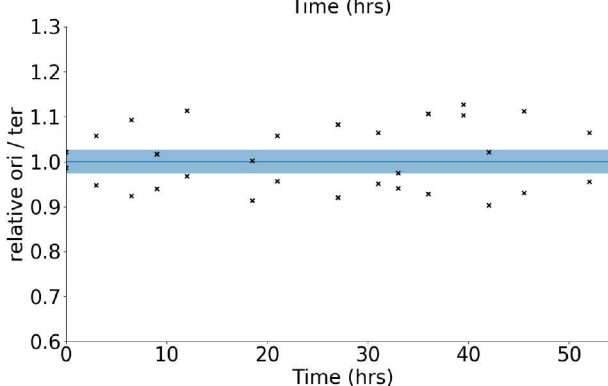

**Fig 2**

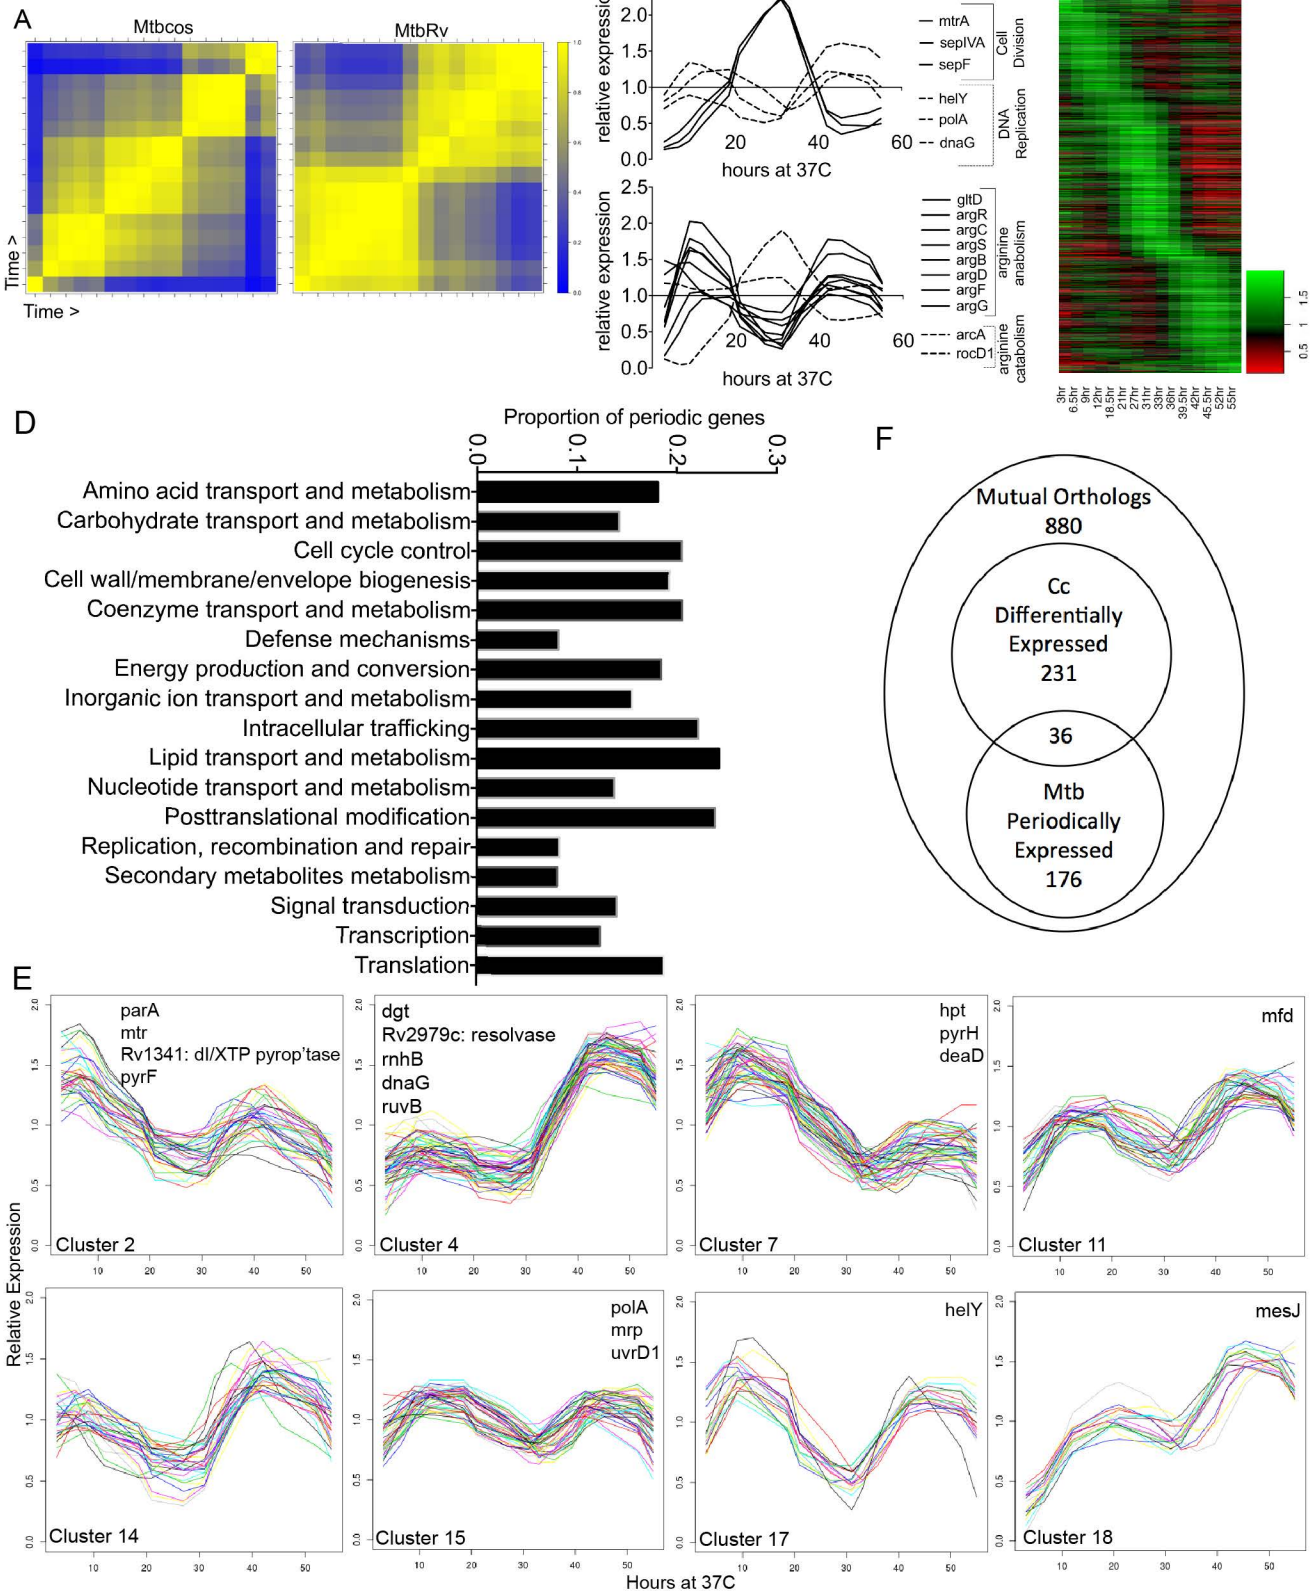



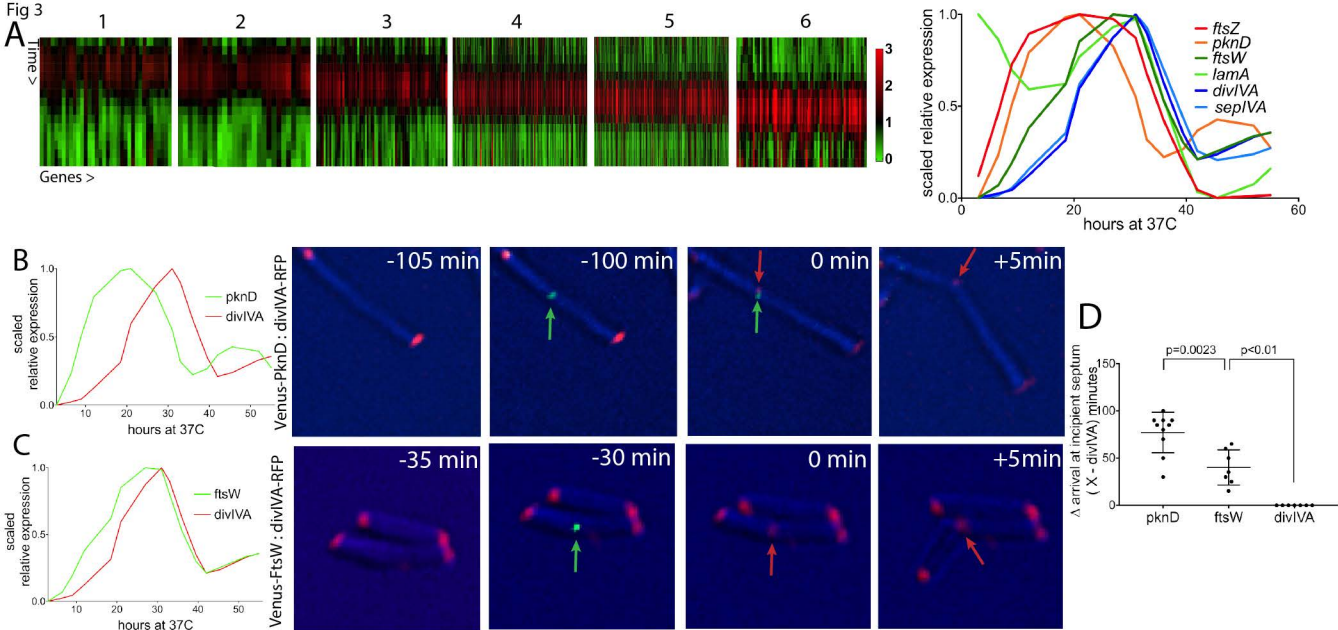

**Fig 4**

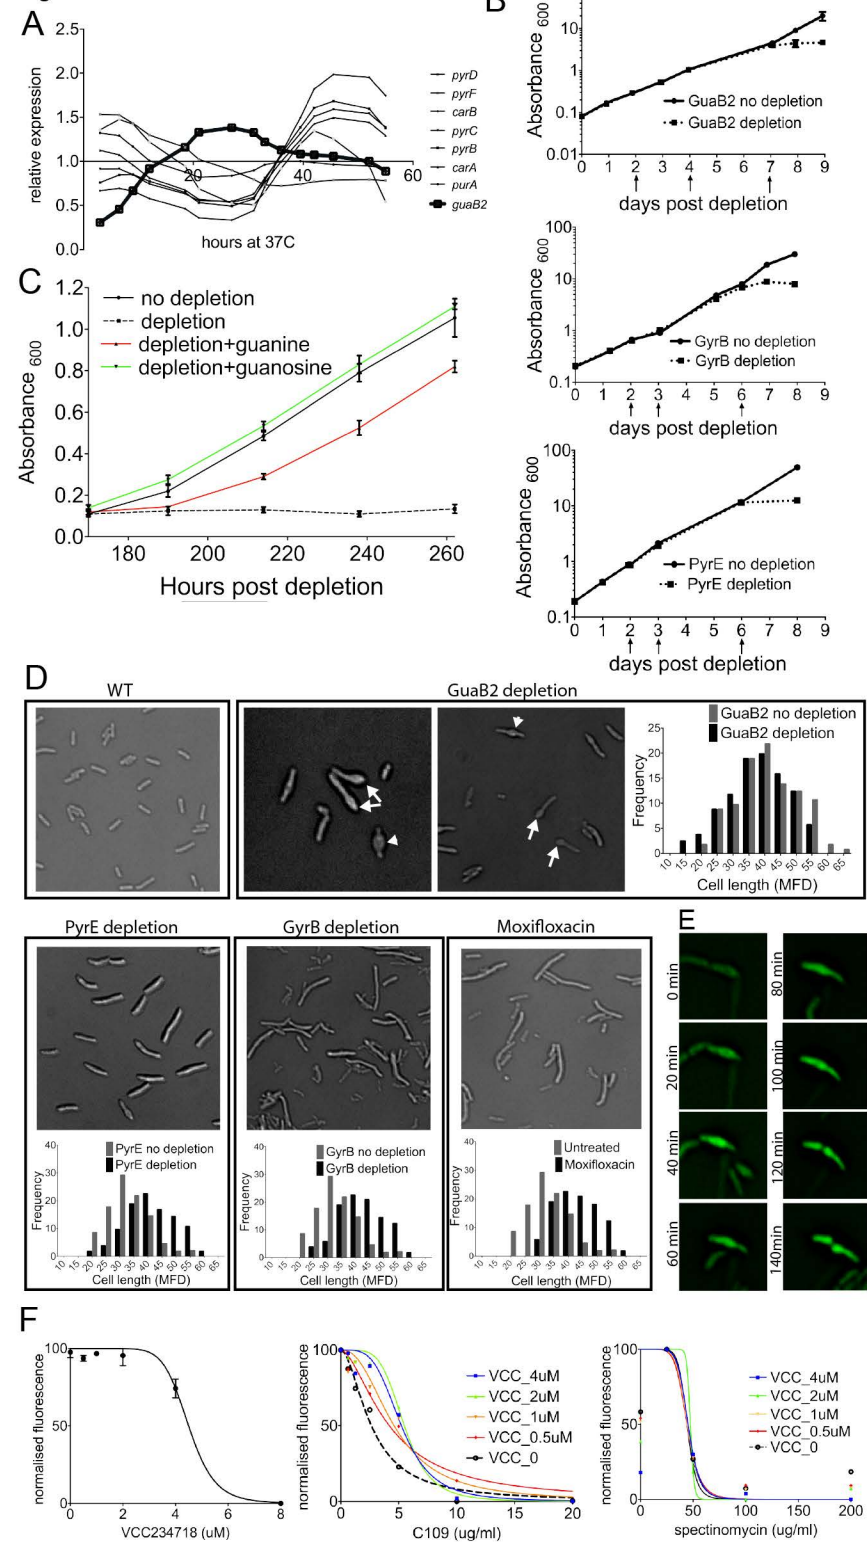

A

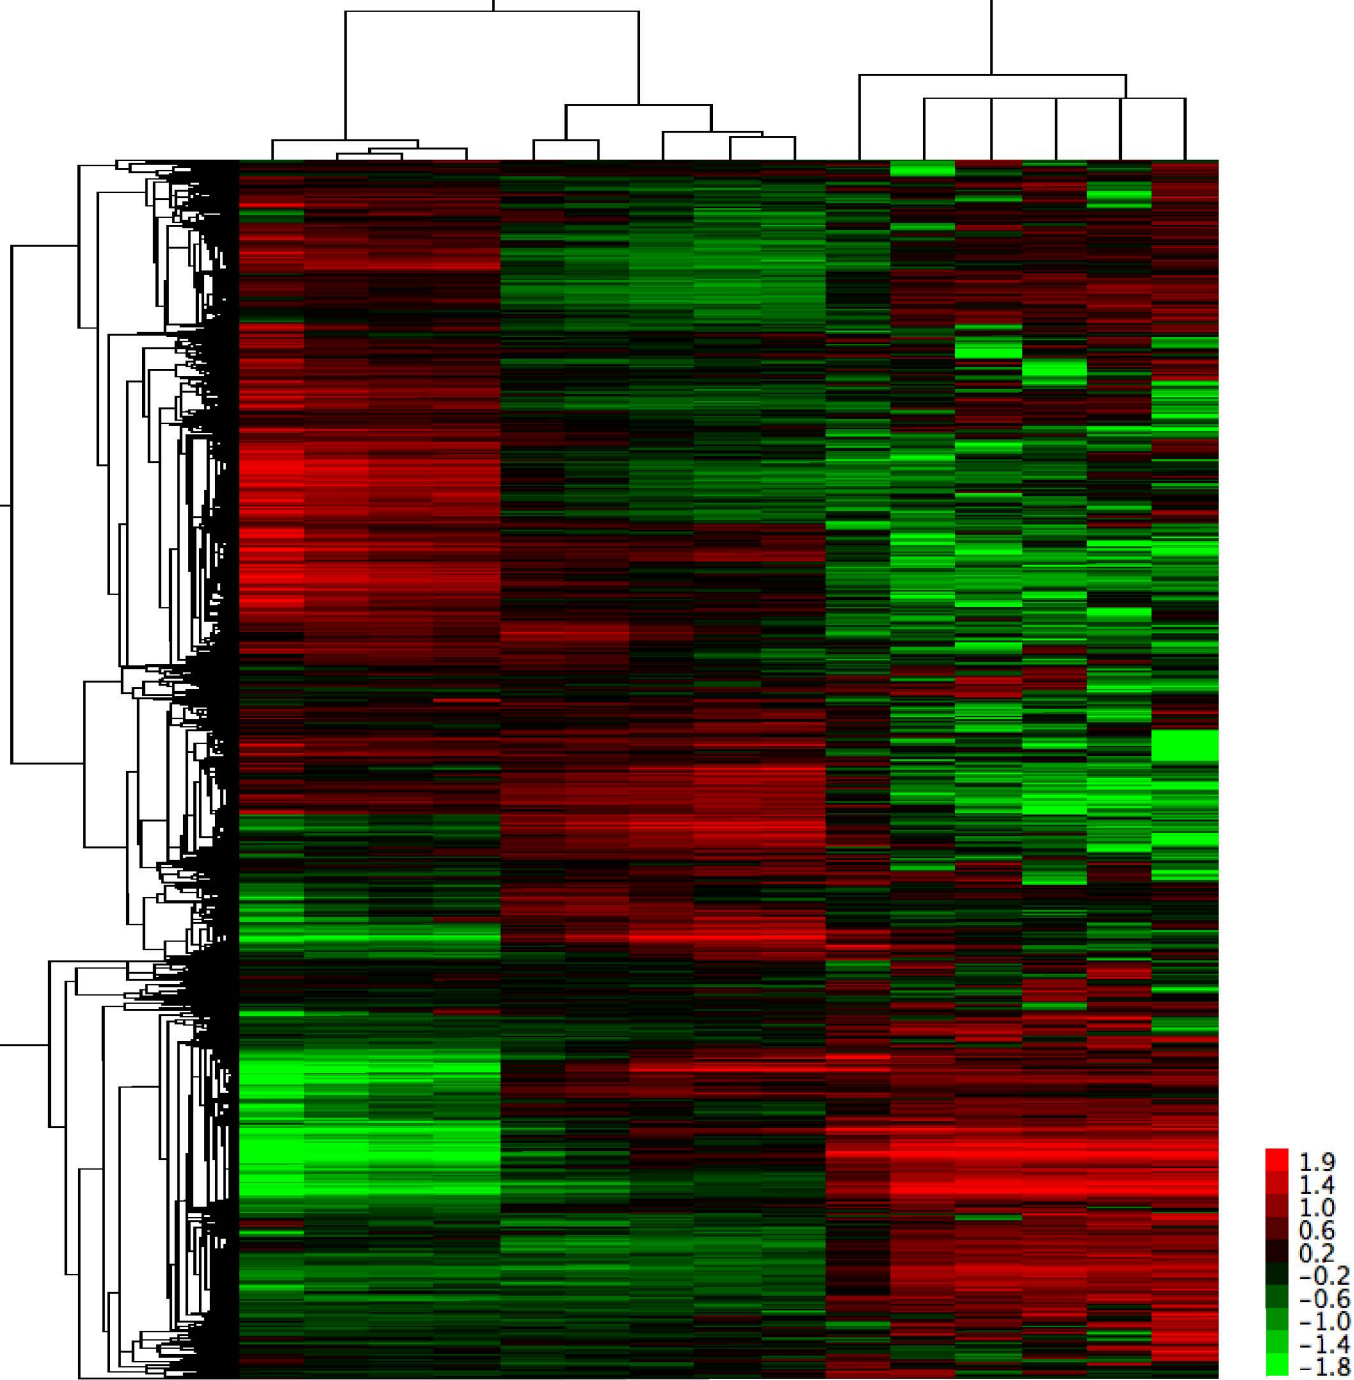

B

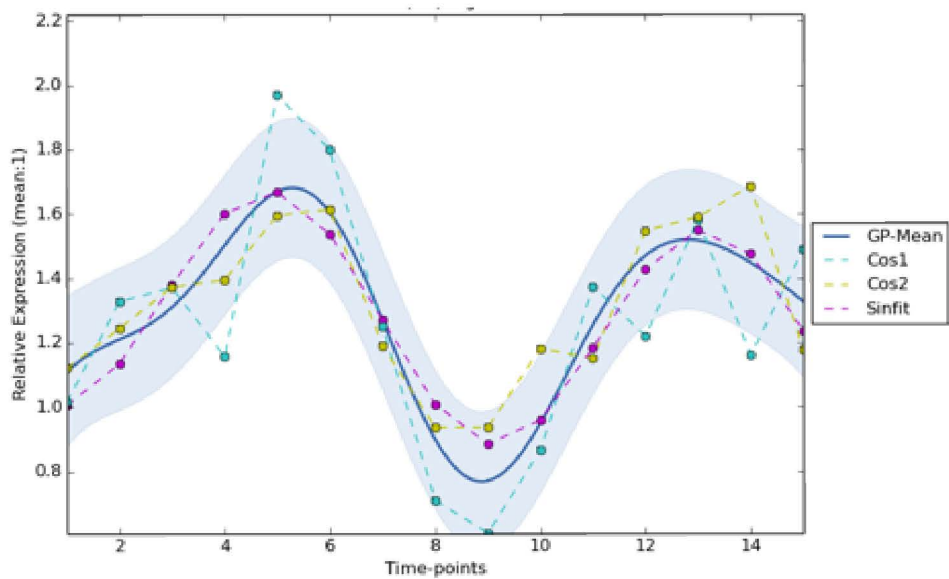

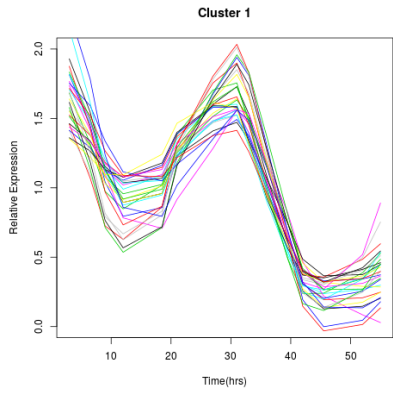

## Mtbcos

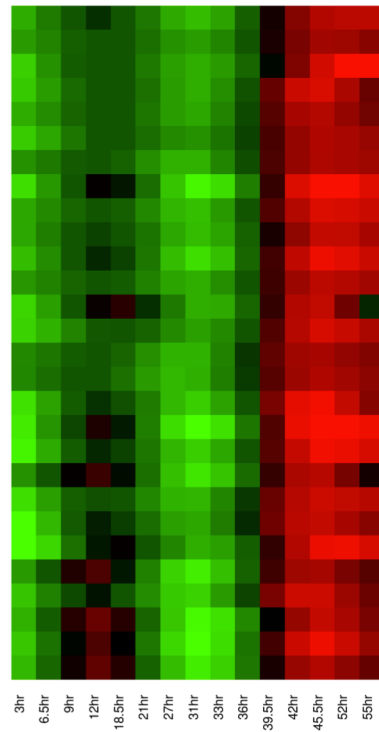

- Carbohydrate transport and metabolism Rv1096
- CellWallbiogenesis Rv1500
- Function unknown Rv1055
- Function unknown Rv2120c
- mmpS3 Function unknown Rv2198c
- Function unknown Rv3780
- Function unknown Rv1870c
- Function unknown Rv0298
- Function unknown Rv1615
- Function unknown Rv1810
- Function unknown Rv2144c
- Function unknown Rv3190A
- TB18.6 General function prediction only Rv2140c
- General function prediction only Rv2548A
- General function prediction only Rv2387
- General function prediction only Rv3337
- sodA Inorganic ion transport and metabolism Rv3846
- ahpC Posttranslational modification Rv2428
- dnaA Replication Rv0001
- Secondary metabolites biosynthesis Rv1498A
- rpsL Translation Rv0682
- rpsB Translation Rv2890c
- rpmH Translation Rv3924c
- rpsF Translation Rv0053
- rpsR1 Translation Rv0055
- rplU Translation Rv2442c
- rpmJ Translation Rv3461c
- infA Translation Rv3462c

## MtbRv

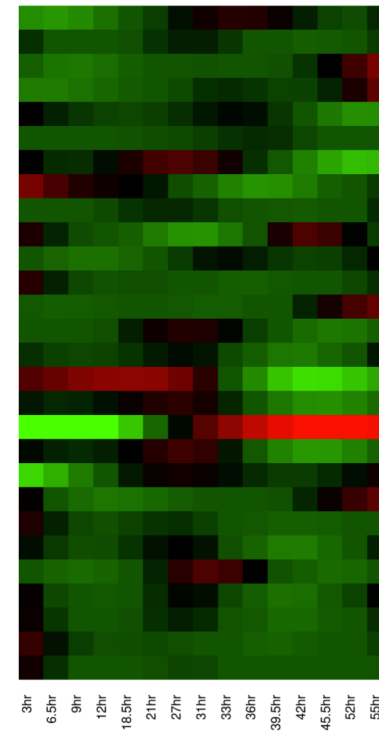

- Carbohydrate transport and metabolism Rv1096
- CellWallbiogenesis Rv1500
- Function unknown Rv1055
- Function unknown Rv2120c
- mmpS3 Function unknown Rv2198c
- Function unknown Rv3780
- Function unknown Rv1870c
- Function unknown Rv0298
- Function unknown Rv1615
- Function unknown Rv1810
- Function unknown Rv2144c
- Function unknown Rv3190A
- TB18.6 General function prediction only Rv2140c
- General function prediction only Rv2548A
- General function prediction only Rv2387
- General function prediction only Rv3337
- sodA Inorganic ion transport and metabolism Rv3846
- ahpC Posttranslational modification Rv2428
- dnaA Replication Rv0001
- Secondary metabolites biosynthesis Rv1498A
- rpsL Translation Rv0682
- rpsB Translation Rv2890c
- rpmH Translation Rv3924c
- rpsF Translation Rv0053
- rpsR1 Translation Rv0055
- rplU Translation Rv2442c
- rpmJ Translation Rv3461c
- infA Translation Rv3462c

### Color Key

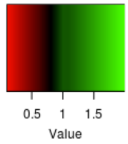

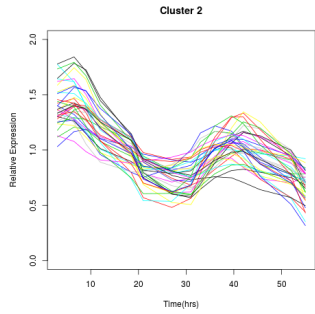

## Mtbcos

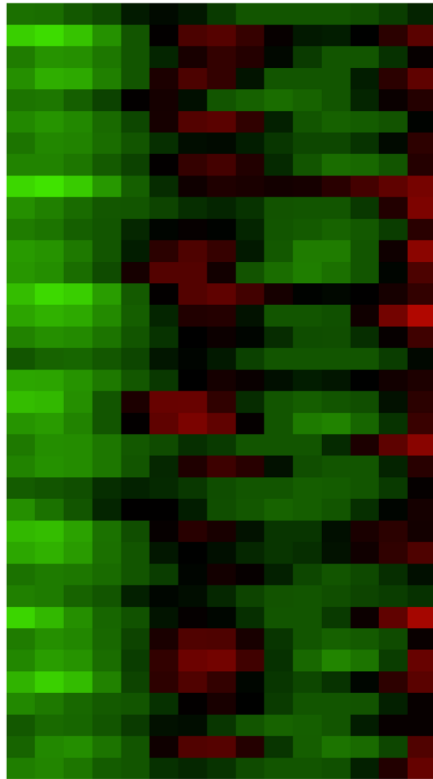

3hr  
6.5hr  
9hr  
12hr  
18.5hr  
21hr  
27hr  
31hr  
33hr  
36hr  
39.5hr  
42hr  
45.5hr  
52hr  
55hr

- Amino acid transport and metabolism Rv2690c
- ppnK Carbohydrate transport and metabolism Rv1695
- rodA Cell cycle control Rv0017c
- parA Cell cycle control Rv3918c
- lpqU CellWallbiogenesis Rv1022
- epiA CellWallbiogenesis Rv1512
- ribF Coenzyme transport and metabolism Rv2786c
- galTa Energy production and conversion Rv0618
- mtr Energy production and conversion Rv2855
- Function unknown Rv0039c
- Function unknown Rv0625c
- Function unknown Rv3770B
- Function unknown Rv3906c
- Function unknown Rv0007
- Function unknown Rv3355c
- Function unknown Rv3695
- eccE5 Function unknown Rv1797
- General function prediction only Rv2223c
- General function prediction only Rv3362c
- General function prediction only Rv0804
- mmpL12 General function prediction only Rv1522c
- General function prediction only Rv3677c
- General function prediction only Rv3376
- secG Intracellular trafficking Rv1440
- Lipid transport and metabolism Rv0517
- menE Lipid transport and metabolism Rv0542c
- Lipid transport and metabolism Rv0945
- purA Nucleotide transport and metabolism Rv0357c
- Nucleotide transport and metabolism Rv1262c
- Nucleotide transport and metabolism Rv1341
- pyrF Nucleotide transport and metabolism Rv1385
- Replication Rv3431c
- orn RNA processing and modification Rv2511
- Transcription Rv0023
- sigJ Transcription Rv3328c
- Translation Rv3300c

## MtbRv

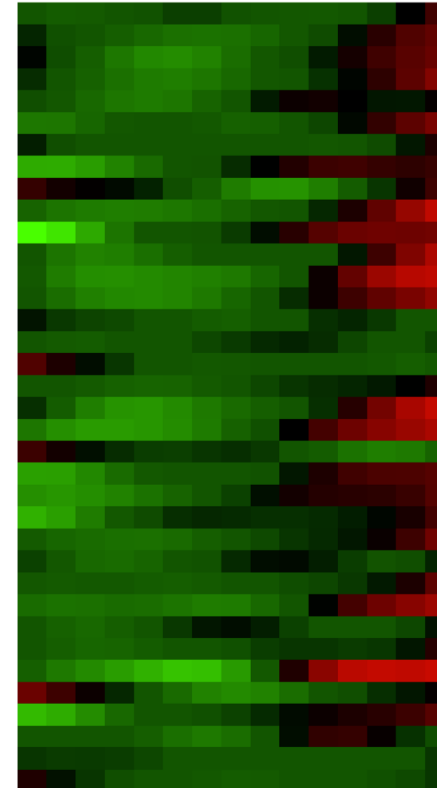

3hr  
6.5hr  
9hr  
12hr  
18.5hr  
21hr  
27hr  
31hr  
33hr  
36hr  
39.5hr  
42hr  
45.5hr  
52hr  
55hr

- Amino acid transport and metabolism Rv2690c
- ppnK Carbohydrate transport and metabolism Rv1695
- rodA Cell cycle control Rv0017c
- parA Cell cycle control Rv3918c
- lpqU CellWallbiogenesis Rv1022
- epiA CellWallbiogenesis Rv1512
- ribF Coenzyme transport and metabolism Rv2786c
- galTa Energy production and conversion Rv0618
- mtr Energy production and conversion Rv2855
- Function unknown Rv0039c
- Function unknown Rv0625c
- Function unknown Rv3770B
- Function unknown Rv3906c
- Function unknown Rv0007
- Function unknown Rv3355c
- Function unknown Rv3695
- eccE5 Function unknown Rv1797
- General function prediction only Rv2223c
- General function prediction only Rv3362c
- General function prediction only Rv0804
- mmpL12 General function prediction only Rv1522c
- General function prediction only Rv3677c
- General function prediction only Rv3376
- secG Intracellular trafficking Rv1440
- Lipid transport and metabolism Rv0517
- menE Lipid transport and metabolism Rv0542c
- Lipid transport and metabolism Rv0945
- purA Nucleotide transport and metabolism Rv0357c
- Nucleotide transport and metabolism Rv1262c
- Nucleotide transport and metabolism Rv1341
- pyrF Nucleotide transport and metabolism Rv1385
- Replication Rv3431c
- orn RNA processing and modification Rv2511
- Transcription Rv0023
- sigJ Transcription Rv3328c
- Translation Rv3300c

### Color Key

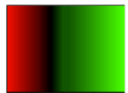

0.5 1 1.5  
Value

Cluster 3

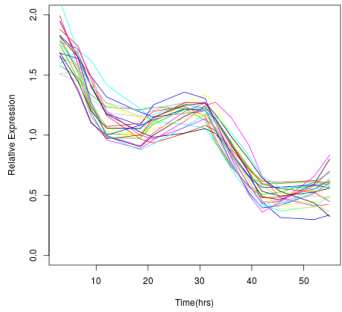

### Mtbcos

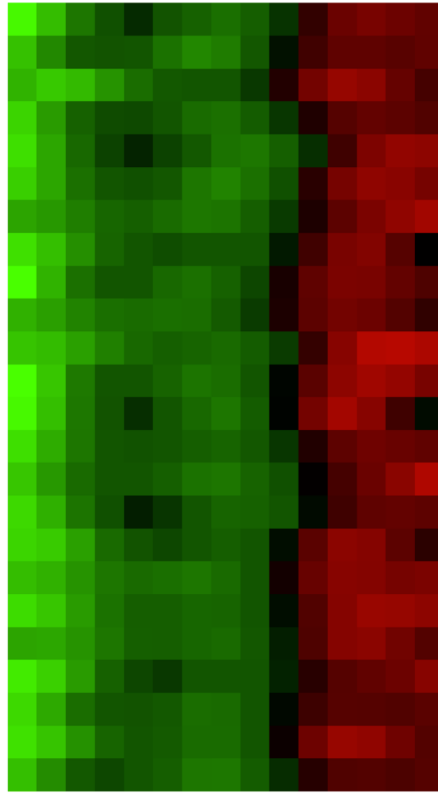

3hr 6.5hr 9hr 12hr 18.5hr 21hr 27hr 31hr 33hr 36hr 39.5hr 42hr 45.5hr 52hr 55hr

- trpG Amino acid transport and metabolism Rv0013
- sahH Coenzyme transport and metabolism Rv3248c
- Coenzyme transport and metabolism Rv0854
- drxA Defense mechanisms Rv2936
- Function unknown Rv0879c
- PE12 Function unknown Rv1172c
- Function unknown Rv1616
- Function unknown Rv1728c
- Function unknown Rv1749c
- Function unknown Rv1762c
- Function unknown Rv1864c
- PPE36 Function unknown Rv2108
- Function unknown Rv2203
- PE26 Function unknown Rv2519
- Function unknown Rv2876
- Function unknown Rv3292
- PE31 Function unknown Rv3477
- General function prediction only Rv2683
- Inorganic ion transport and metabolism Rv3679
- rsfB Signal transduction mechanisms Rv3687c
- Transcription Rv0081
- hspR Transcription Rv0353
- rplK Translation Rv0640
- tsf Translation Rv2889c

### MtbRv

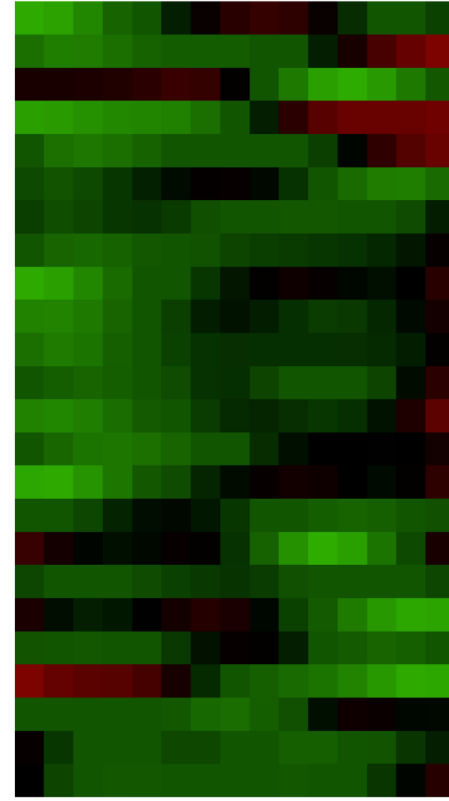

3hr 6.5hr 9hr 12hr 18.5hr 21hr 27hr 31hr 33hr 36hr 39.5hr 42hr 45.5hr 52hr 55hr

- trpG Amino acid transport and metabolism Rv0013
- sahH Coenzyme transport and metabolism Rv3248c
- Coenzyme transport and metabolism Rv0854
- drxA Defense mechanisms Rv2936
- Function unknown Rv0879c
- PE12 Function unknown Rv1172c
- Function unknown Rv1616
- Function unknown Rv1728c
- Function unknown Rv1749c
- Function unknown Rv1762c
- Function unknown Rv1864c
- PPE36 Function unknown Rv2108
- Function unknown Rv2203
- PE26 Function unknown Rv2519
- Function unknown Rv2876
- Function unknown Rv3292
- PE31 Function unknown Rv3477
- General function prediction only Rv2683
- Inorganic ion transport and metabolism Rv3679
- rsfB Signal transduction mechanisms Rv3687c
- Transcription Rv0081
- hspR Transcription Rv0353
- rplK Translation Rv0640
- tsf Translation Rv2889c

Color Key

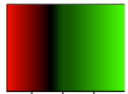

0.5 1 1.5  
Value

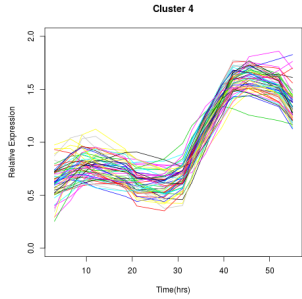

## Mtbcos

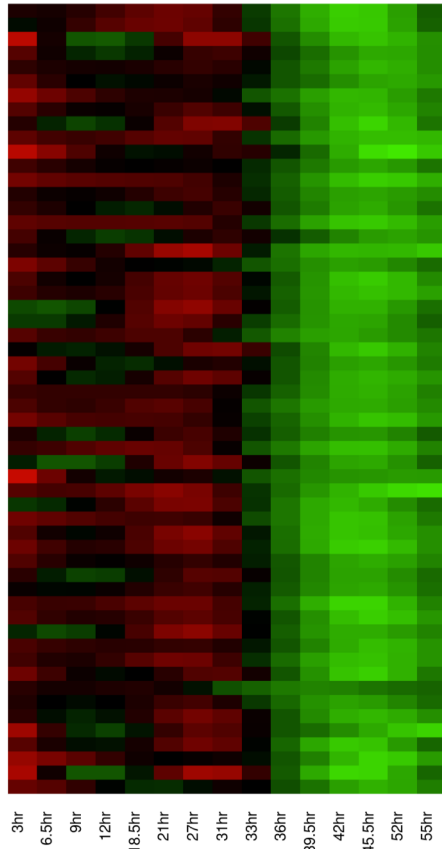

- Amino acid transport and metabolism Rv0492c
- lpqW Amino acid transport and metabolism Rv1166
- argJ Amino acid transport and metabolism Rv1653
- aroK Amino acid transport and metabolism Rv2539c
- aroA Amino acid transport and metabolism Rv3227
- pheA Amino acid transport and metabolism Rv3838c
- glgB Carbohydrate transport and metabolism Rv1326c
- pdC Carbohydrate transport and metabolism Rv0853c
- menC CellWallbiogenesis Rv0553
- CellWallbiogenesis Rv0024
- CellWallbiogenesis Rv1478
- hemD Coenzyme transport and metabolism Rv0511
- menH Coenzyme transport and metabolism Rv0558
- fbtC Coenzyme transport and metabolism Rv1173
- folC Coenzyme transport and metabolism Rv2447c
- folD Coenzyme transport and metabolism Rv3356c
- hemB Coenzyme transport and metabolism Rv0512
- lipP Defense mechanisms Rv2463
- citA Energy production and conversion Rv0889c
- ackA Energy production and conversion Rv0409
- Energy production and conversion Rv0561c
- lpdA Energy production and conversion Rv3303c
- PPE42 Function unknown Rv2608
- Function unknown Rv3770c
- Function unknown Rv1312
- Function unknown Rv2345
- Function unknown Rv2474c
- Function unknown Rv2732c
- Function unknown Rv3091
- PE\_PGRS59 Function unknown Rv3595c
- lpqG Function unknown Rv3623
- Function unknown Rv3658c
- Function unknown Rv3909
- Function unknown Rv2033c
- PE\_PGRS24 Function unknown Rv1325c
- General function prediction only Rv1204c
- General function prediction only Rv1770
- General function prediction only Rv2475c
- General function prediction only Rv0552
- General function prediction only Rv2314c
- General function prediction only Rv3510c
- fhf Intracellular trafficking Rv2916c
- fadE2 Lipid transport and metabolism Rv0154c
- fadA2 Lipid transport and metabolism Rv0243
- echA9 Lipid transport and metabolism Rv1071c
- dgt Nucleotide transport and metabolism Rv2344c
- mycP5 Posttranslational modification Rv1796
- Posttranslational modification Rv3421c
- Replication Rv2979c
- rnhB Replication Rv2902c
- dnaG Replication Rv2343c
- ruvB Replication Rv2592c
- devS Signal transduction mechanisms Rv3132c
- trcR Signal transduction mechanisms Rv1033c
- argR Transcription Rv1657
- valS Translation Rv2448c

## MtbRv

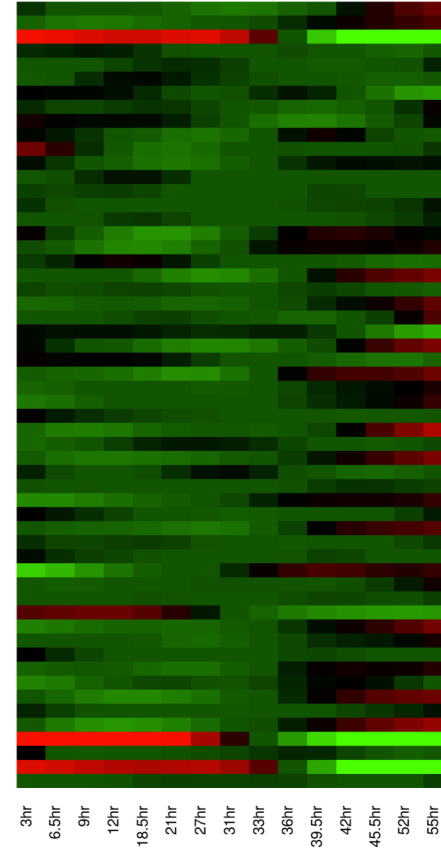

- Amino acid transport and metabolism Rv0492c
- lpqW Amino acid transport and metabolism Rv1166
- argJ Amino acid transport and metabolism Rv1653
- aroK Amino acid transport and metabolism Rv2539c
- aroA Amino acid transport and metabolism Rv3227
- pheA Amino acid transport and metabolism Rv3838c
- glgB Carbohydrate transport and metabolism Rv1326c
- pdC Carbohydrate transport and metabolism Rv0853c
- menC CellWallbiogenesis Rv0553
- CellWallbiogenesis Rv0024
- CellWallbiogenesis Rv1478
- hemD Coenzyme transport and metabolism Rv0511
- menH Coenzyme transport and metabolism Rv0558
- fbtC Coenzyme transport and metabolism Rv1173
- folC Coenzyme transport and metabolism Rv2447c
- folD Coenzyme transport and metabolism Rv3356c
- hemB Coenzyme transport and metabolism Rv0512
- lipP Defense mechanisms Rv2463
- citA Energy production and conversion Rv0889c
- ackA Energy production and conversion Rv0409
- Energy production and conversion Rv0561c
- lpdA Energy production and conversion Rv3303c
- PPE42 Function unknown Rv2608
- Function unknown Rv3770c
- Function unknown Rv1312
- Function unknown Rv2345
- Function unknown Rv2474c
- Function unknown Rv2732c
- Function unknown Rv3091
- PE\_PGRS59 Function unknown Rv3595c
- lpqG Function unknown Rv3623
- Function unknown Rv3658c
- Function unknown Rv3909
- Function unknown Rv2033c
- PE\_PGRS24 Function unknown Rv1325c
- General function prediction only Rv1204c
- General function prediction only Rv1770
- General function prediction only Rv2475c
- General function prediction only Rv0552
- General function prediction only Rv2314c
- General function prediction only Rv3510c
- fhf Intracellular trafficking Rv2916c
- fadE2 Lipid transport and metabolism Rv0154c
- fadA2 Lipid transport and metabolism Rv0243
- echA9 Lipid transport and metabolism Rv1071c
- dgt Nucleotide transport and metabolism Rv2344c
- mycP5 Posttranslational modification Rv1796
- Posttranslational modification Rv3421c
- Replication Rv2979c
- rnhB Replication Rv2902c
- dnaG Replication Rv2343c
- ruvB Replication Rv2592c
- devS Signal transduction mechanisms Rv3132c
- trcR Signal transduction mechanisms Rv1033c
- argR Transcription Rv1657
- valS Translation Rv2448c

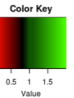

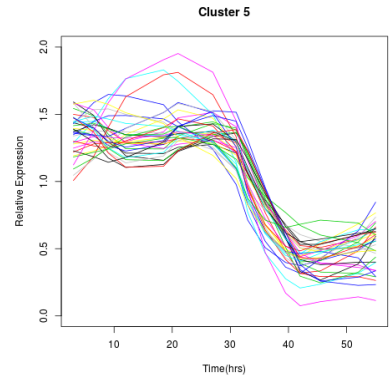

## Mtbcos

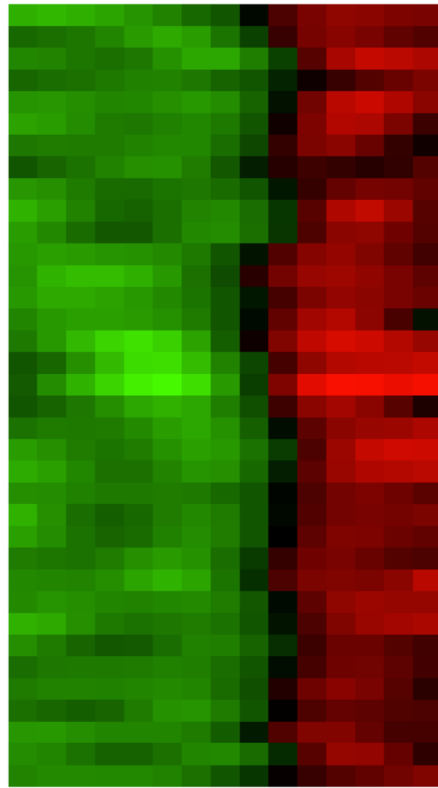

3hr  
6.5hr  
9hr  
12hr  
18.5hr  
21hr  
27hr  
31hr  
33hr  
36hr  
39.5hr  
42hr  
45.5hr  
52hr  
55hr

- Amino acid transport and metabolism Rv3684
- hisA Amino acid transport and metabolism Rv1603
- glnA2 Amino acid transport and metabolism Rv2222c
- Carbohydrate transport and metabolism Rv3075c
- lipA Coenzyme transport and metabolism Rv2218
- icd2 Energy production and conversion Rv0066c
- gpdA1 Energy production and conversion Rv0564c
- glpQ1 Energy production and conversion Rv3842c
- Function unknown Rv0025
- Function unknown Rv0909
- Function unknown Rv3822
- esxP Function unknown Rv2347c
- Function unknown Rv0349
- Function unknown Rv1871c
- Function unknown Rv1269c
- Function unknown Rv0463
- Function unknown Rv2175c
- Function unknown Rv3612c
- Function unknown Rv3705A
- Function unknown Rv0543c
- espR Function unknown Rv3849
- General function prediction only Rv0229c
- General function prediction only Rv2581c
- General function prediction only Rv2716
- General function prediction only Rv3338
- adhC General function prediction only Rv3045
- General function prediction only Rv3284
- tatA Intracellular trafficking Rv2094c
- fadD25 Lipid transport and metabolism Rv1521
- fadD32 Lipid transport and metabolism Rv3801c
- fadD14 Lipid transport and metabolism Rv1058
- Lipid transport and metabolism Rv2361c
- fadD28 Lipid transport and metabolism Rv2941
- Posttranslational modification Rv1324
- pkc3 Secondary metabolites biosynthesis Rv1180
- yrbE2B Secondary metabolites biosynthesis Rv0588

## MtbRv

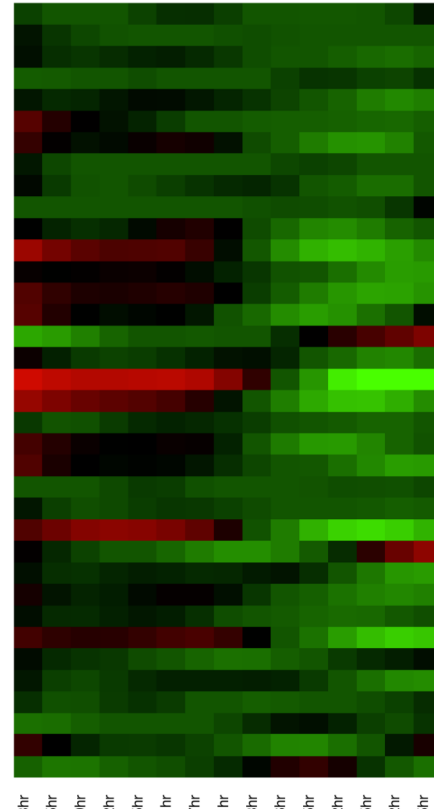

3hr  
6.5hr  
9hr  
12hr  
18.5hr  
21hr  
27hr  
31hr  
33hr  
36hr  
39.5hr  
42hr  
45.5hr  
52hr  
55hr

- Amino acid transport and metabolism Rv3684
- hisA Amino acid transport and metabolism Rv1603
- glnA2 Amino acid transport and metabolism Rv2222c
- Carbohydrate transport and metabolism Rv3075c
- lipA Coenzyme transport and metabolism Rv2218
- icd2 Energy production and conversion Rv0066c
- gpdA1 Energy production and conversion Rv0564c
- glpQ1 Energy production and conversion Rv3842c
- Function unknown Rv0025
- Function unknown Rv0909
- Function unknown Rv3822
- esxP Function unknown Rv2347c
- Function unknown Rv0349
- Function unknown Rv1871c
- Function unknown Rv1269c
- Function unknown Rv0463
- Function unknown Rv2175c
- Function unknown Rv3612c
- Function unknown Rv3705A
- Function unknown Rv0543c
- espR Function unknown Rv3849
- General function prediction only Rv0229c
- General function prediction only Rv2581c
- General function prediction only Rv2716
- General function prediction only Rv3338
- adhC General function prediction only Rv3045
- General function prediction only Rv3284
- tatA Intracellular trafficking Rv2094c
- fadD25 Lipid transport and metabolism Rv1521
- fadD32 Lipid transport and metabolism Rv3801c
- fadD14 Lipid transport and metabolism Rv1058
- Lipid transport and metabolism Rv2361c
- fadD28 Lipid transport and metabolism Rv2941
- Posttranslational modification Rv1324
- pkc3 Secondary metabolites biosynthesis Rv1180
- yrbE2B Secondary metabolites biosynthesis Rv0588

**Color Key**

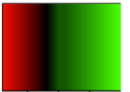

0.5 1 1.5  
Value



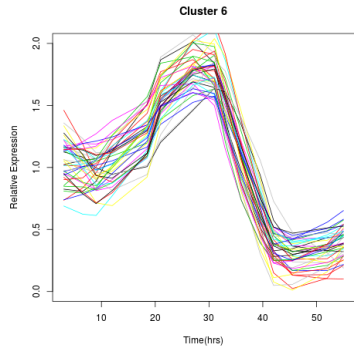

## Mtbcos

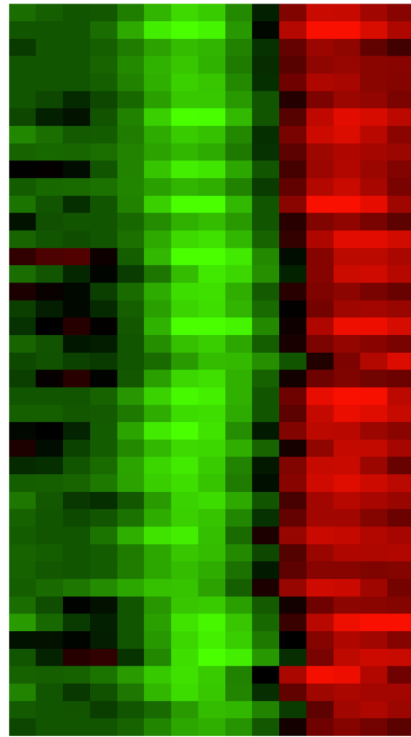

3hr  
6.5hr  
9hr  
12hr  
18.5hr  
21hr  
27hr  
31hr  
33hr  
36hr  
39.5hr  
42hr  
45.5hr  
52hr  
55hr

hisB Amino acid transport and metabolism Rv1601  
 glnB Amino acid transport and metabolism Rv2919c  
 - CellWallbiogenesis Rv2721c  
 fdxC Energy production and conversion Rv1177  
 - Function unknown Rv0027  
 vapB31 Function unknown Rv0748  
 - Function unknown Rv0863  
 - Function unknown Rv1261c  
 esxN Function unknown Rv1793  
 - Function unknown Rv2632c  
 - Function unknown Rv3190c  
 - Function unknown Rv3528c  
 - Function unknown Rv0426c  
 - Function unknown Rv0559c  
 - Function unknown Rv0686  
 - Function unknown Rv0755A  
 - Function unknown Rv1072  
 - Function unknown Rv1211  
 pup Function unknown Rv2111c  
 whiB1 Function unknown Rv3219  
 - Function unknown Rv3642c  
 - Function unknown Rv3675  
 vapC2 General function prediction only Rv0301  
 vapB48 General function prediction only Rv3697A  
 cysA2 Inorganic ion transport and metabolism Rv0815c  
 phoY2 Inorganic ion transport and metabolism Rv0821c  
 cysA3 Inorganic ion transport and metabolism Rv3117  
 sseA Inorganic ion transport and metabolism Rv3283  
 - Inorganic ion transport and metabolism Rv3049c  
 fadE20 Lipid transport and metabolism Rv2724c  
 fadE24 Lipid transport and metabolism Rv3139  
 prcB Posttranslational modification Rv2110c  
 - Secondary metabolites biosynthesis Rv1978  
 ephG Secondary metabolites biosynthesis Rv2740  
 - Secondary metabolites biosynthesis Rv0726c  
 lprD Transcription Rv1343c  
 - Transcription Rv1404  
 parD1 Transcription Rv1960c  
 relE Translation Rv1246c  
 frr Translation Rv2882c  
 rpmE Translation Rv1298  
 ileS Translation Rv1536

## MtbRv

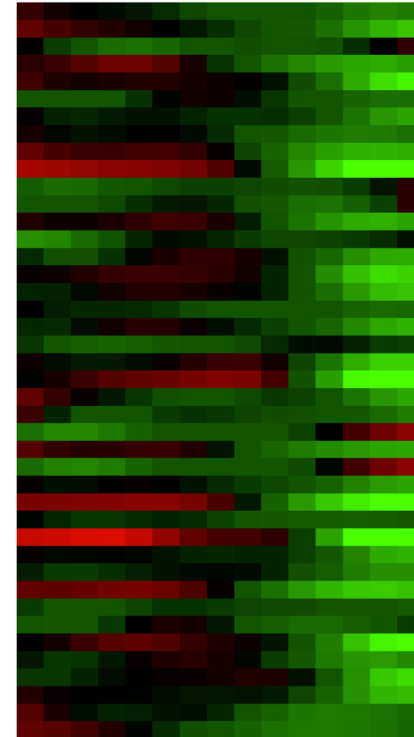

3hr  
6.5hr  
9hr  
12hr  
18.5hr  
21hr  
27hr  
31hr  
33hr  
36hr  
39.5hr  
42hr  
45.5hr  
52hr  
55hr

hisB Amino acid transport and metabolism Rv1601  
 glnB Amino acid transport and metabolism Rv2919c  
 - CellWallbiogenesis Rv2721c  
 fdxC Energy production and conversion Rv1177  
 - Function unknown Rv0027  
 vapB31 Function unknown Rv0748  
 - Function unknown Rv0863  
 - Function unknown Rv1261c  
 esxN Function unknown Rv1793  
 - Function unknown Rv2632c  
 - Function unknown Rv3190c  
 - Function unknown Rv3528c  
 - Function unknown Rv0426c  
 - Function unknown Rv0559c  
 - Function unknown Rv0686  
 - Function unknown Rv0755A  
 - Function unknown Rv1072  
 - Function unknown Rv1211  
 pup Function unknown Rv2111c  
 whiB1 Function unknown Rv3219  
 - Function unknown Rv3642c  
 - Function unknown Rv3675  
 vapC2 General function prediction only Rv0301  
 vapB48 General function prediction only Rv3697A  
 cysA2 Inorganic ion transport and metabolism Rv0815c  
 phoY2 Inorganic ion transport and metabolism Rv0821c  
 cysA3 Inorganic ion transport and metabolism Rv3117  
 sseA Inorganic ion transport and metabolism Rv3283  
 - Inorganic ion transport and metabolism Rv3049c  
 fadE20 Lipid transport and metabolism Rv2724c  
 fadE24 Lipid transport and metabolism Rv3139  
 prcB Posttranslational modification Rv2110c  
 - Secondary metabolites biosynthesis Rv1978  
 ephG Secondary metabolites biosynthesis Rv2740  
 - Secondary metabolites biosynthesis Rv0726c  
 lprD Transcription Rv1343c  
 - Transcription Rv1404  
 parD1 Transcription Rv1960c  
 relE Translation Rv1246c  
 frr Translation Rv2882c  
 rpmE Translation Rv1298  
 ileS Translation Rv1536

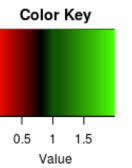

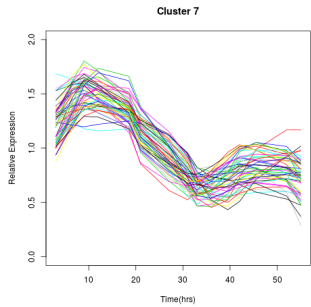

## Mtbcos

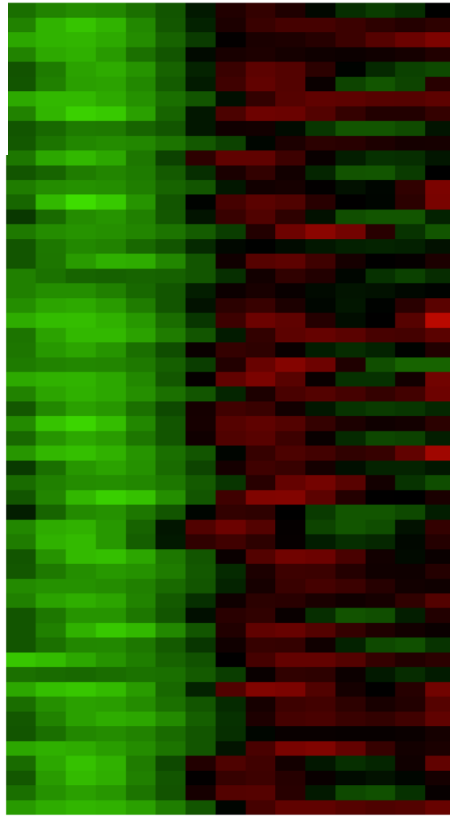

3hr  
6.5hr  
9hr  
12hr  
18.5hr  
21hr  
27hr  
31hr  
33hr  
36hr  
39.5hr  
42hr  
45.5hr  
52hr  
55hr

- Amino acid transport and metabolism Rv1413
- Amino acid transport and metabolism Rv1769
- Amino acid transport and metabolism Rv2409c
- proA Amino acid transport and metabolism Rv2427c
- proZ Amino acid transport and metabolism Rv3756c
- proW Amino acid transport and metabolism Rv3757c
- Carbohydrate transport and metabolism Rv0525
- Carbohydrate transport and metabolism Rv1410c
- pmmA Carbohydrate transport and metabolism Rv325f
- pgi Carbohydrate transport and metabolism Rv0946c
- eccC5 Cell cycle control Rv1783
- manB CellWallbiogenesis Rv3264c
- thiG Coenzyme transport and metabolism Rv0417
- cobO Coenzyme transport and metabolism Rv2849c
- folP1 Coenzyme transport and metabolism Rv3608c
- Energy production and conversion Rv0044c
- dlaT Energy production and conversion Rv2215
- Energy production and conversion Rv2454c
- Function unknown Rv1836c
- lprC Function unknown Rv1275
- rskA Function unknown Rv0444c
- mce2B Function unknown Rv0590
- eccB5 Function unknown Rv1782
- eccD5 Function unknown Rv1795
- Function unknown Rv2410c
- Function unknown Rv2446c
- Function unknown Rv3136A
- Function unknown Rv3691
- Function unknown Rv3701c
- Function unknown Rv3703c
- Function unknown Rv3732
- Function unknown Rv0051
- Function unknown Rv2772c
- Function unknown Rv3605c
- eccD1 Function unknown Rv3877
- General function prediction only Rv1021
- General function prediction only Rv2004c
- eis General function prediction only Rv2416c
- mmpL7 General function prediction only Rv2942
- secA1 Intracellular trafficking Rv3240c
- lipT Lipid transport and metabolism Rv2045c
- echA14 Lipid transport and metabolism Rv2486
- Lipid transport and metabolism Rv3814c
- Lipid transport and metabolism Rv3815c
- hpt Nucleotide transport and metabolism Rv3624c
- pyrH Nucleotide transport and metabolism Rv2883c
- Posttranslational modification Rv0526
- pIA Posttranslational modification Rv3138
- eccA1 Posttranslational modification Rv3868
- deaD Replication Rv1253
- mce2A Secondary metabolites biosynthesis Rv0589
- pkS11 Secondary metabolites biosynthesis Rv1665
- ppgK Transcription Rv2702
- Translation Rv1301
- hisS Translation Rv2580c

## MtbRv

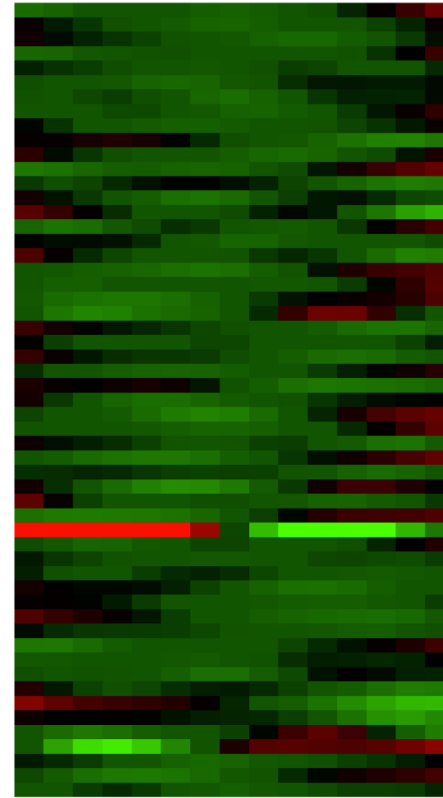

3hr  
6.5hr  
9hr  
12hr  
18.5hr  
21hr  
27hr  
31hr  
33hr  
36hr  
39.5hr  
42hr  
45.5hr  
52hr  
55hr

- Amino acid transport and metabolism Rv1413
- Amino acid transport and metabolism Rv1769
- Amino acid transport and metabolism Rv2409c
- proA Amino acid transport and metabolism Rv2427c
- proZ Amino acid transport and metabolism Rv3756c
- proW Amino acid transport and metabolism Rv3757c
- Carbohydrate transport and metabolism Rv0525
- Carbohydrate transport and metabolism Rv1410c
- pmmA Carbohydrate transport and metabolism Rv3257c
- pgi Carbohydrate transport and metabolism Rv0946c
- eccC5 Cell cycle control Rv1783
- manB CellWallbiogenesis Rv3264c
- thiG Coenzyme transport and metabolism Rv0417
- cobO Coenzyme transport and metabolism Rv2849c
- folP1 Coenzyme transport and metabolism Rv3608c
- Energy production and conversion Rv0044c
- dlaT Energy production and conversion Rv2215
- Energy production and conversion Rv2454c
- Function unknown Rv1836c
- lprC Function unknown Rv1275
- rskA Function unknown Rv0444c
- mce2B Function unknown Rv0590
- eccB5 Function unknown Rv1782
- eccD5 Function unknown Rv1795
- Function unknown Rv2410c
- Function unknown Rv2446c
- Function unknown Rv3136A
- Function unknown Rv3691
- Function unknown Rv3701c
- Function unknown Rv3703c
- Function unknown Rv3732
- Function unknown Rv0051
- Function unknown Rv2772c
- Function unknown Rv3605c
- eccD1 Function unknown Rv3877
- General function prediction only Rv1021
- General function prediction only Rv2004c
- eis General function prediction only Rv2416c
- mmpL7 General function prediction only Rv2942
- secA1 Intracellular trafficking Rv3240c
- lipT Lipid transport and metabolism Rv2045c
- echA14 Lipid transport and metabolism Rv2486
- Lipid transport and metabolism Rv3814c
- Lipid transport and metabolism Rv3815c
- hpt Nucleotide transport and metabolism Rv3624c
- pyrH Nucleotide transport and metabolism Rv2883c
- Posttranslational modification Rv0526
- pIA Posttranslational modification Rv3138
- eccA1 Posttranslational modification Rv3868
- deaD Replication Rv1253
- mce2A Secondary metabolites biosynthesis Rv0589
- pkS11 Secondary metabolites biosynthesis Rv1665
- ppgK Transcription Rv2702
- Translation Rv1301
- hisS Translation Rv2580c

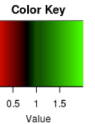

Cluster 8

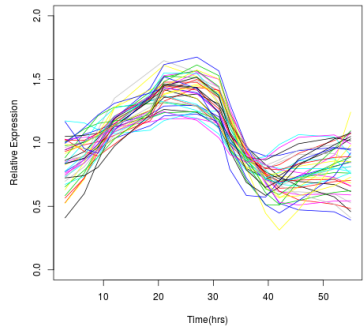

### Mtbcos

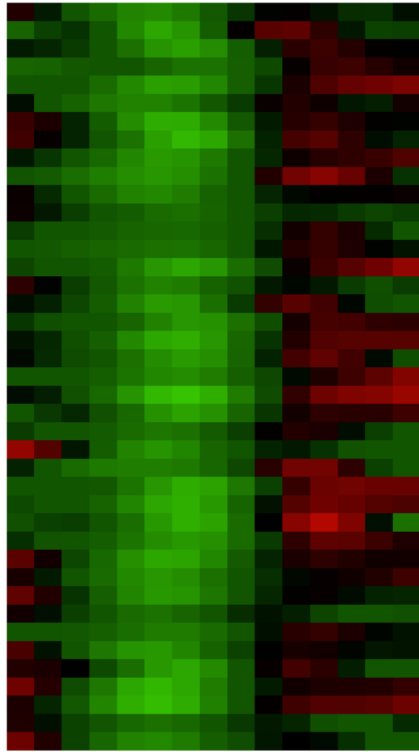

3hr  
6.5hr  
9hr  
12hr  
18.5hr  
21hr  
27hr  
31hr  
33hr  
36hr  
39.5hr  
42hr  
45.5hr  
52hr  
55hr

- Amino acid transport and metabolism Rv1178
- cysH Amino acid transport and metabolism Rv235
- hisH Amino acid transport and metabolism Rv1602
- arcA Amino acid transport and metabolism Rv1001
- relB Cell cycle control Rv1247c
- ripA CellWallbiogenesis Rv1477
- nadE Coenzyme transport and metabolism Rv243
- moeW Coenzyme transport and metabolism Rv23
- Energy production and conversion Rv1812c
- fadB5 Energy production and conversion Rv1912c
- aceAb Energy production and conversion Rv1916
- Energy production and conversion Rv0147
- Energy production and conversion Rv0223c
- Energy production and conversion Rv1248c
- Energy production and conversion Rv3719
- PE\_PGSR35 Function unknown Rv1983
- Function unknown Rv2180c
- PPE12 Function unknown Rv0755c
- Function unknown Rv1052
- Function unknown Rv1056
- Function unknown Rv1209
- Function unknown Rv1443c
- Function unknown Rv1813c
- General function prediction only Rv0045c
- vapC3 General function prediction only Rv0549c
- General function prediction only Rv0786c
- moxR1 General function prediction only Rv1479
- General function prediction only Rv1869c
- vapC35 General function prediction only Rv1962c
- General function prediction only Rv3683
- fadE1 Lipid transport and metabolism Rv0131c
- fadD31 Lipid transport and metabolism Rv1925
- fadD15 Lipid transport and metabolism Rv2187
- accD1 Lipid transport and metabolism Rv2502c
- fadE10 Lipid transport and metabolism Rv0873
- Posttranslational modification Rv1488
- Replication Rv3828c
- senX3 Signal transduction mechanisms Rv0490
- regX3 Signal transduction mechanisms Rv0491
- sigG Transcription Rv0182c
- fusA2 Translation Rv0120c

### MtbRv

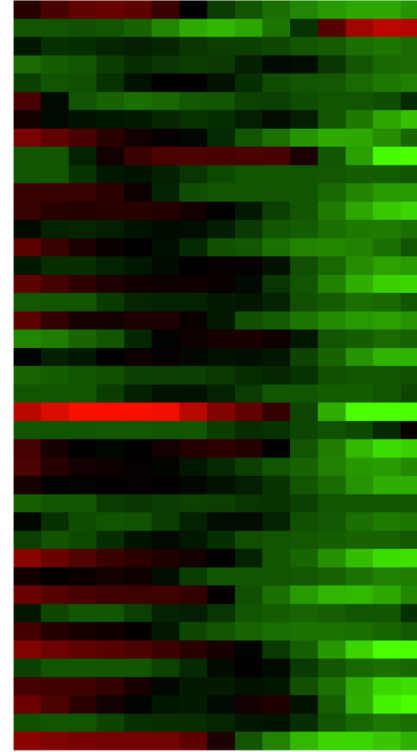

3hr  
6.5hr  
9hr  
12hr  
18.5hr  
21hr  
27hr  
31hr  
33hr  
36hr  
39.5hr  
42hr  
45.5hr  
52hr  
55hr

- Amino acid transport and metabolism Rv1178
- cysH Amino acid transport and metabolism Rv2392
- hisH Amino acid transport and metabolism Rv1602
- arcA Amino acid transport and metabolism Rv1001
- relB Cell cycle control Rv1247c
- ripA CellWallbiogenesis Rv1477
- nadE Coenzyme transport and metabolism Rv2438c
- moeW Coenzyme transport and metabolism Rv2338c
- Energy production and conversion Rv1812c
- fadB5 Energy production and conversion Rv1912c
- aceAb Energy production and conversion Rv1916
- Energy production and conversion Rv0147
- Energy production and conversion Rv0223c
- Energy production and conversion Rv1248c
- Energy production and conversion Rv3719
- PE\_PGSR35 Function unknown Rv1983
- Function unknown Rv2180c
- PPE12 Function unknown Rv0755c
- Function unknown Rv1052
- Function unknown Rv1056
- Function unknown Rv1209
- Function unknown Rv1443c
- Function unknown Rv1813c
- General function prediction only Rv0045c
- vapC3 General function prediction only Rv0549c
- General function prediction only Rv0786c
- moxR1 General function prediction only Rv1479
- General function prediction only Rv1869c
- vapC35 General function prediction only Rv1962c
- General function prediction only Rv3683
- fadE1 Lipid transport and metabolism Rv0131c
- fadD31 Lipid transport and metabolism Rv1925
- fadD15 Lipid transport and metabolism Rv2187
- accD1 Lipid transport and metabolism Rv2502c
- fadE10 Lipid transport and metabolism Rv0873
- Posttranslational modification Rv1488
- Replication Rv3828c
- senX3 Signal transduction mechanisms Rv0490
- regX3 Signal transduction mechanisms Rv0491
- sigG Transcription Rv0182c
- fusA2 Translation Rv0120c

Color Key



0.5 1 1.5  
Value

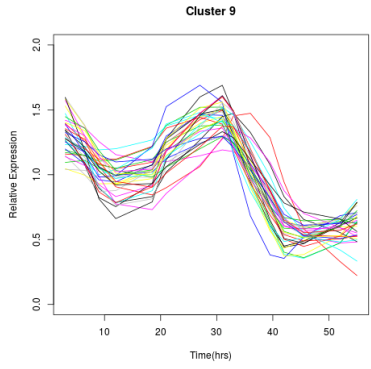

## Mtbcos

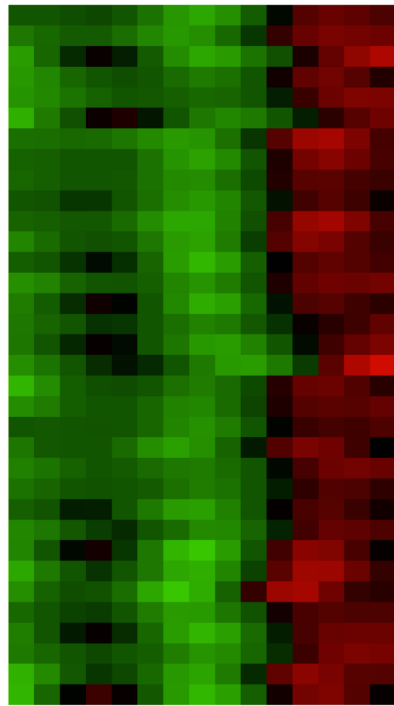

3hr  
6.5hr  
9hr  
12hr  
18.5hr  
21hr  
27hr  
31hr  
33hr  
36hr  
39.5hr  
42hr  
45.5hr  
52hr  
55hr

- fba Carbohydrate transport and metabolism Rv0363c
- murA CellWallbiogenesis Rv1315
- mscL CellWallbiogenesis Rv0985c
- dfrA Coenzyme transport and metabolism Rv2763c
- Function unknown Rv0314c
- rpFB Function unknown Rv1009
- Function unknown Rv0309
- Function unknown Rv0190
- Function unknown Rv0192A
- Function unknown Rv0323c
- Function unknown Rv0730
- Function unknown Rv1314c
- Function unknown Rv2018
- PPE59 Function unknown Rv3429
- Function unknown Rv3686c
- Function unknown Rv3716c
- Function unknown Rv0531
- Function unknown Rv0609A
- obg General function prediction only Rv2440c
- phoY1 Inorganic ion transport and metabolism Rv3301c
- modC Inorganic ion transport and metabolism Rv1859
- Intracellular trafficking Rv1944c
- Lipid transport and metabolism Rv2766c
- Lipid transport and metabolism Rv0769
- Lipid transport and metabolism Rv1245c
- trxB2 Posttranslational modification Rv3913
- ssb Replication Rv0054
- Replication Rv2309c
- mazF5 Signal transduction mechanisms Rv1942c
- Transcription Rv0238
- sigA Transcription Rv2703
- Transcription Rv2840c
- rpIY Translation Rv1015c
- rpmA Translation Rv2441c

## MtbRv

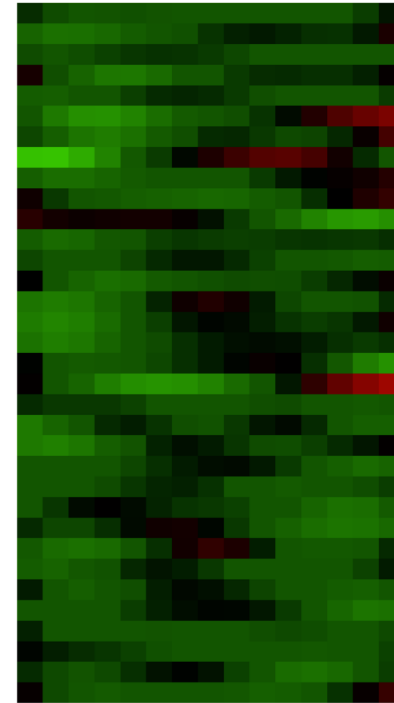

3hr  
6.5hr  
9hr  
12hr  
18.5hr  
21hr  
27hr  
31hr  
33hr  
36hr  
39.5hr  
42hr  
45.5hr  
52hr  
55hr

- fba Carbohydrate transport and metabolism Rv0363c
- murA CellWallbiogenesis Rv1315
- mscL CellWallbiogenesis Rv0985c
- dfrA Coenzyme transport and metabolism Rv2763c
- Function unknown Rv0314c
- rpFB Function unknown Rv1009
- Function unknown Rv0309
- Function unknown Rv0190
- Function unknown Rv0192A
- Function unknown Rv0323c
- Function unknown Rv0730
- Function unknown Rv1314c
- Function unknown Rv2018
- PPE59 Function unknown Rv3429
- Function unknown Rv3686c
- Function unknown Rv3716c
- Function unknown Rv0531
- Function unknown Rv0609A
- obg General function prediction only Rv2440c
- phoY1 Inorganic ion transport and metabolism Rv3301c
- modC Inorganic ion transport and metabolism Rv1859
- Intracellular trafficking Rv1944c
- Lipid transport and metabolism Rv2766c
- Lipid transport and metabolism Rv0769
- Lipid transport and metabolism Rv1245c
- trxB2 Posttranslational modification Rv3913
- ssb Replication Rv0054
- Replication Rv2309c
- mazF5 Signal transduction mechanisms Rv1942c
- Transcription Rv0238
- sigA Transcription Rv2703
- Transcription Rv2840c
- rpIY Translation Rv1015c
- rpmA Translation Rv2441c

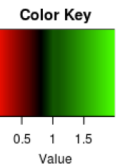

Cluster 10

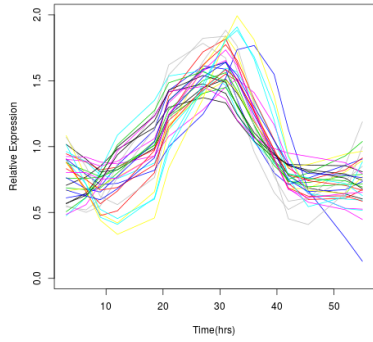

Mtbcos

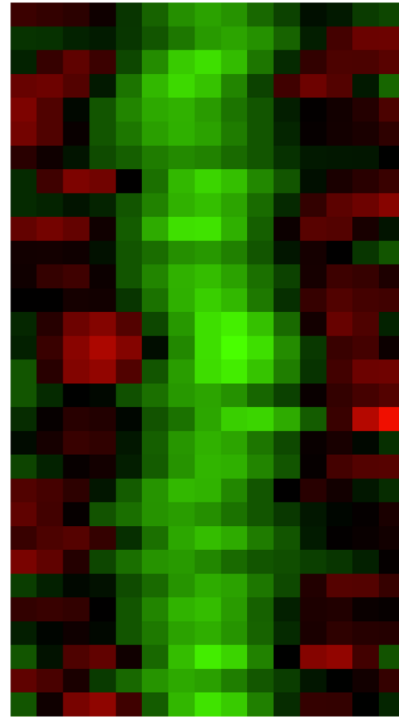

3hr  
6.5hr  
9hr  
12hr  
18.5hr  
21hr  
27hr  
31hr  
33hr  
36hr  
39.5hr  
42hr  
45.5hr  
52hr  
55hr

wag31 Cell cycle control Rv2145c  
mmaA1 CellWallbiogenesis Rv0645c  
panB Coenzyme transport and metabolism Rv22  
- Energy production and conversion Rv0763c  
acg Energy production and conversion Rv2032  
kstD Energy production and conversion Rv3537  
- Function unknown Rv1100  
PPE19 Function unknown Rv1361c  
fxsA Function unknown Rv2053c  
- Function unknown Rv2172c  
aprB Function unknown Rv2395B  
- Function unknown Rv2639c  
- Function unknown Rv3848  
- Function unknown Rv2645  
- Function unknown Rv2699c  
- Function unknown Rv3603c  
- General function prediction only Rv0060  
- General function prediction only Rv1986  
- Inorganic ion transport and metabolism Rv3161  
secE1 Intracellular trafficking Rv0638  
fadE6 Lipid transport and metabolism Rv0271c  
- Lipid transport and metabolism Rv2182c  
ispD Lipid transport and metabolism Rv3582c  
- Secondary metabolites biosynthesis Rv2675c  
- Secondary metabolites biosynthesis Rv0145  
- Secondary metabolites biosynthesis Rv0146  
garA Signal transduction mechanisms Rv1827  
mazE9 Signal transduction mechanisms Rv2801  
rnc Transcription Rv2925c  
rpoB Transcription Rv0667

MtbRv

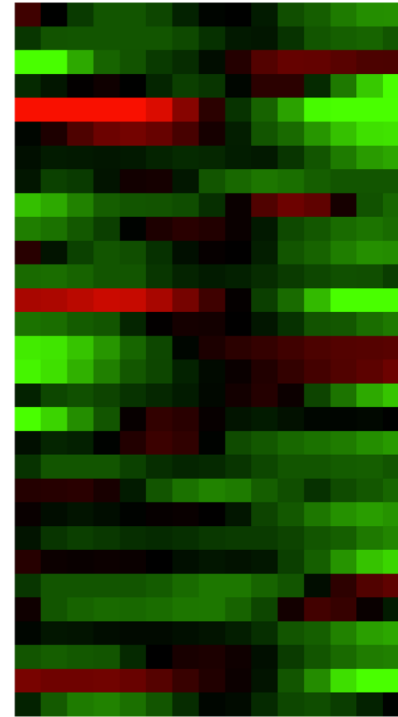

3hr  
6.5hr  
9hr  
12hr  
18.5hr  
21hr  
27hr  
31hr  
33hr  
36hr  
39.5hr  
42hr  
45.5hr  
52hr  
55hr

wag31 Cell cycle control Rv2145c  
mmaA1 CellWallbiogenesis Rv0645c  
panB Coenzyme transport and metabolism Rv2225  
- Energy production and conversion Rv0763c  
acg Energy production and conversion Rv2032  
kstD Energy production and conversion Rv3537  
- Function unknown Rv1100  
PPE19 Function unknown Rv1361c  
fxsA Function unknown Rv2053c  
- Function unknown Rv2172c  
aprB Function unknown Rv2395B  
- Function unknown Rv2639c  
- Function unknown Rv3848  
- Function unknown Rv2645  
- Function unknown Rv2699c  
- Function unknown Rv3603c  
- General function prediction only Rv0060  
- General function prediction only Rv1986  
- Inorganic ion transport and metabolism Rv3161c  
secE1 Intracellular trafficking Rv0638  
fadE6 Lipid transport and metabolism Rv0271c  
- Lipid transport and metabolism Rv2182c  
ispD Lipid transport and metabolism Rv3582c  
- Secondary metabolites biosynthesis Rv2675c  
- Secondary metabolites biosynthesis Rv0145  
- Secondary metabolites biosynthesis Rv0146  
garA Signal transduction mechanisms Rv1827  
mazE9 Signal transduction mechanisms Rv2801A  
rnc Transcription Rv2925c  
rpoB Transcription Rv0667

Color Key



0.5 1 1.5  
Value

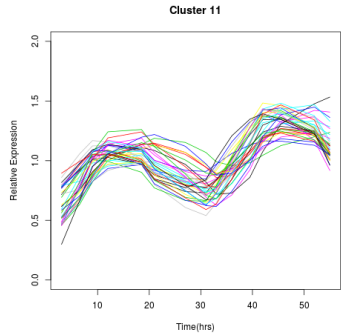

## Mtbcos

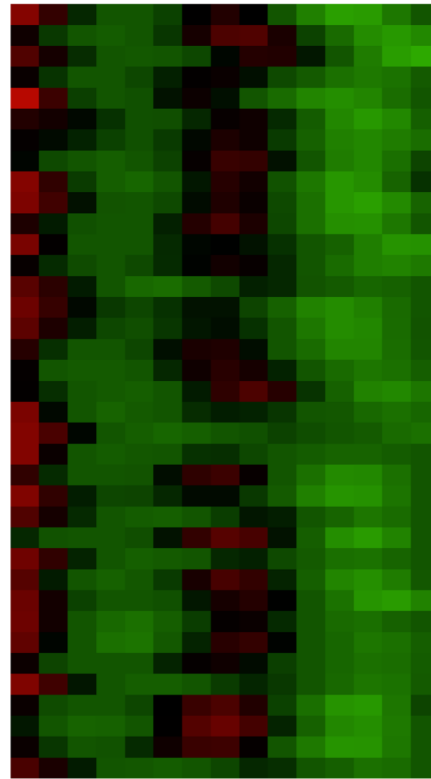

3hr  
6.5hr  
9hr  
12hr  
18.5hr  
21hr  
27hr  
31hr  
33hr  
36hr  
39.5hr  
42hr  
45.5hr  
52hr  
55hr

- gabP Amino acid transport and metabolism Rv0522
- aroE Amino acid transport and metabolism Rv2552c
- hisF Amino acid transport and metabolism Rv1605
- Cell cycle control Rv0530
- dacB1 CellWallbiogenesis Rv3330
- murC CellWallbiogenesis Rv2152c
- thiE Coenzyme transport and metabolism Rv0414c
- idsA2 Coenzyme transport and metabolism Rv2173
- Energy production and conversion Rv2776c
- narX Energy production and conversion Rv1736c
- leuB Energy production and conversion Rv2995c
- Energy production and conversion Rv0458
- Energy production and conversion Rv1257c
- Function unknown Rv3626c
- Function unknown Rv0398c
- Function unknown Rv1486c
- Function unknown Rv0080
- Function unknown Rv1510
- whiA Function unknown Rv1423
- PE\_PGRS31 Function unknown Rv1768
- Function unknown Rv0307c
- General function prediction only Rv1220c
- General function prediction only Rv1639c
- General function prediction only Rv3312c
- General function prediction only Rv0245
- General function prediction only Rv3422c
- General function prediction only Rv3542c
- General function prediction only Rv3813c
- recX General function prediction only Rv2736c
- Inorganic ion transport and metabolism Rv2325c
- Inorganic ion transport and metabolism Rv2326c
- echA4 Lipid transport and metabolism Rv0673
- Lipid transport and metabolism Rv1627c
- fadE16 Lipid transport and metabolism Rv1679
- Posttranslational modification Rv0528
- mfd Replication Rv1020
- erm(37) Translation Rv1988

## MtbRv

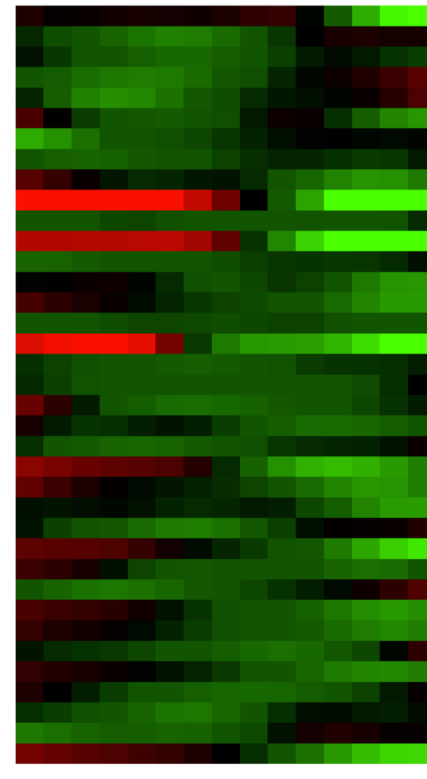

3hr  
6.5hr  
9hr  
12hr  
18.5hr  
21hr  
27hr  
31hr  
33hr  
36hr  
39.5hr  
42hr  
45.5hr  
52hr  
55hr

- gabP Amino acid transport and metabolism Rv0522
- aroE Amino acid transport and metabolism Rv2552c
- hisF Amino acid transport and metabolism Rv1605
- Cell cycle control Rv0530
- dacB1 CellWallbiogenesis Rv3330
- murC CellWallbiogenesis Rv2152c
- thiE Coenzyme transport and metabolism Rv0414c
- idsA2 Coenzyme transport and metabolism Rv2173
- Energy production and conversion Rv2776c
- narX Energy production and conversion Rv1736c
- leuB Energy production and conversion Rv2995c
- Energy production and conversion Rv0458
- Energy production and conversion Rv1257c
- Function unknown Rv3626c
- Function unknown Rv0398c
- Function unknown Rv1486c
- Function unknown Rv0080
- Function unknown Rv1510
- whiA Function unknown Rv1423
- PE\_PGRS31 Function unknown Rv1768
- Function unknown Rv0307c
- General function prediction only Rv1220c
- General function prediction only Rv1639c
- General function prediction only Rv3312c
- General function prediction only Rv0245
- General function prediction only Rv3422c
- General function prediction only Rv3542c
- General function prediction only Rv3813c
- recX General function prediction only Rv2736c
- Inorganic ion transport and metabolism Rv2325c
- Inorganic ion transport and metabolism Rv2326c
- echA4 Lipid transport and metabolism Rv0673
- Lipid transport and metabolism Rv1627c
- fadE16 Lipid transport and metabolism Rv1679
- Posttranslational modification Rv0528
- mfd Replication Rv1020
- erm(37) Translation Rv1988

Color Key

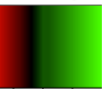

0.5 1 1.5  
Value

Cluster 12

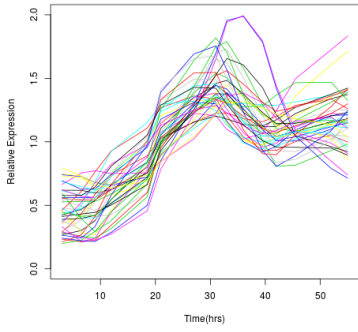

### Mtbcos

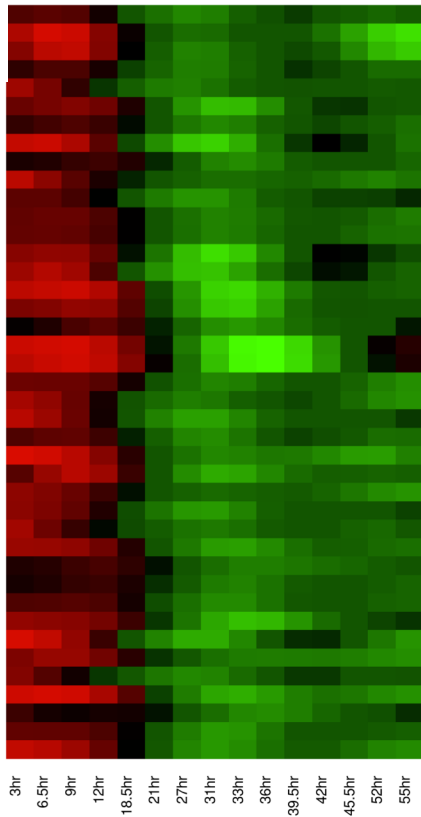

- gcvB Amino acid transport and metabolism Rv1832
- cysK2 Amino acid transport and metabolism Rv0848
- Carbohydrate transport and metabolism Rv0849
- murD CellWallbiogenesis Rv2155c
- CellWallbiogenesis Rv2165c
- Energy production and conversion Rv0940c
- sthA Energy production and conversion Rv2713
- Energy production and conversion Rv3230c
- aldA Energy production and conversion Rv0768
- fgd2 Energy production and conversion Rv0132c
- Function unknown Rv3847
- Function unknown Rv2015c
- Function unknown Rv2302
- Function unknown Rv3182
- cut5a Function unknown Rv3724A
- Function unknown Rv1588c
- rpIC Function unknown Rv1884c
- Function unknown Rv2295
- Function unknown Rv2656c
- Function unknown Rv2714
- hbhA Function unknown Rv0475
- Function unknown Rv1861
- General function prediction only Rv2867c
- General function prediction only Rv1833c
- General function prediction only Rv2650c
- Inorganic ion transport and metabolism Rv2025c
- katG Inorganic ion transport and metabolism Rv1908c
- fadE28 Lipid transport and metabolism Rv3544c
- Lipid transport and metabolism Rv3551
- scoA Lipid transport and metabolism Rv2504c
- ispF Lipid transport and metabolism Rv3581c
- thyA Nucleotide transport and metabolism Rv2764c
- pepD Posttranslational modification Rv0983
- mpt53 Posttranslational modification Rv2878c
- hupB Replication Rv2986c
- Secondary metabolites biosynthesis Rv0846c
- phoH2 Signal transduction mechanisms Rv1095
- arsC Signal transduction mechanisms Rv2643
- Signal transduction mechanisms Rv2242
- Transcription Rv1765c
- Translation Rv0088

### MtbRv

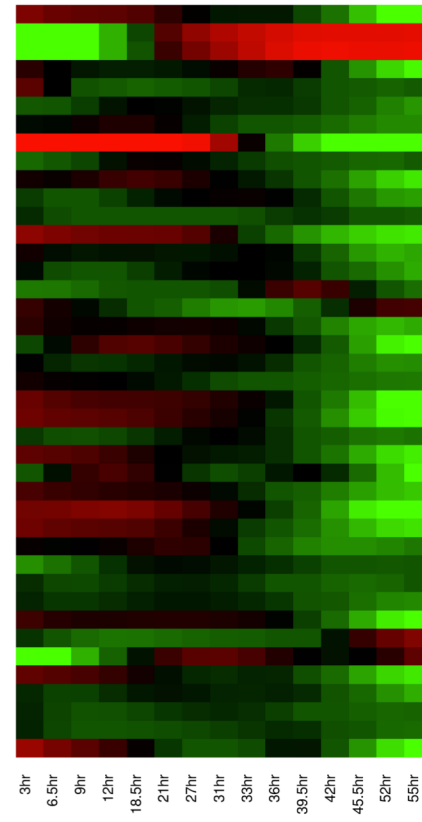

- gcvB Amino acid transport and metabolism Rv1832
- cysK2 Amino acid transport and metabolism Rv0848
- Carbohydrate transport and metabolism Rv0849
- murD CellWallbiogenesis Rv2155c
- CellWallbiogenesis Rv2165c
- Energy production and conversion Rv0940c
- sthA Energy production and conversion Rv2713
- Energy production and conversion Rv3230c
- aldA Energy production and conversion Rv0768
- fgd2 Energy production and conversion Rv0132c
- Function unknown Rv3847
- Function unknown Rv2015c
- Function unknown Rv2302
- Function unknown Rv3182
- cut5a Function unknown Rv3724A
- Function unknown Rv1588c
- rpIC Function unknown Rv1884c
- Function unknown Rv2295
- Function unknown Rv2656c
- Function unknown Rv2714
- hbhA Function unknown Rv0475
- Function unknown Rv1861
- General function prediction only Rv2867c
- General function prediction only Rv1833c
- General function prediction only Rv2650c
- Inorganic ion transport and metabolism Rv2025c
- katG Inorganic ion transport and metabolism Rv1908c
- fadE28 Lipid transport and metabolism Rv3544c
- Lipid transport and metabolism Rv3551
- scoA Lipid transport and metabolism Rv2504c
- ispF Lipid transport and metabolism Rv3581c
- thyA Nucleotide transport and metabolism Rv2764c
- pepD Posttranslational modification Rv0983
- mpt53 Posttranslational modification Rv2878c
- hupB Replication Rv2986c
- Secondary metabolites biosynthesis Rv0846c
- phoH2 Signal transduction mechanisms Rv1095
- arsC Signal transduction mechanisms Rv2643
- Signal transduction mechanisms Rv2242
- Transcription Rv1765c
- Translation Rv0088

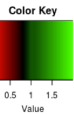

Cluster 13

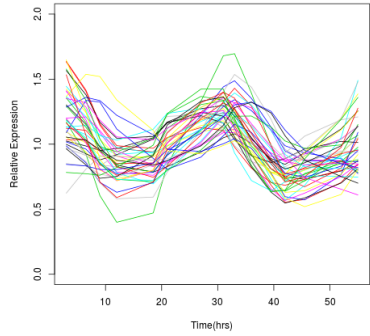

## Mtbcos

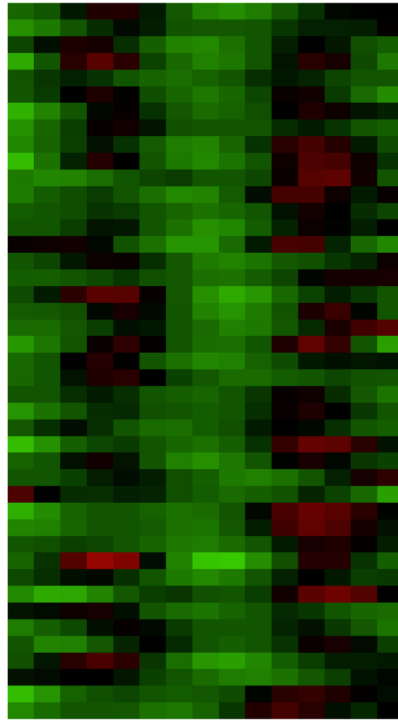

3hr  
6.5hr  
9hr  
12hr  
18.5hr  
21hr  
27hr  
31hr  
33hr  
36hr  
39.5hr  
42hr  
45.5hr  
52hr  
56hr

- sugI Carbohydrate transport and metabolism Rv3331
- vapB5 Cell cycle control Rv0626
- mptB3 CellWallbiogenesis Rv2873
- panD Coenzyme transport and metabolism Rv3601c
- glcB Energy production and conversion Rv1837c
- gabD2 Energy production and conversion Rv1731
- mshB Function unknown Rv1170
- mihF Function unknown Rv1388
- dedA Function unknown Rv2637
- Function unknown Rv2734
- Function unknown Rv1951c
- mazE5 Function unknown Rv1943c
- Function unknown Rv0611c
- Function unknown Rv2513
- PE\_PGSR60 Function unknown Rv3652
- Function unknown Rv1171
- Function unknown Rv1249c
- mgtC Function unknown Rv1811
- Function unknown Rv1875
- Function unknown Rv2219A
- Function unknown Rv2081c
- General function prediction only Rv2715
- General function prediction only Rv3034c
- General function prediction only Rv2296
- atsD Inorganic ion transport and metabolism Rv0663
- sirA Inorganic ion transport and metabolism Rv2391
- fadE4 Lipid transport and metabolism Rv0231
- fadD26 Lipid transport and metabolism Rv2930
- fadA6 Lipid transport and metabolism Rv3556c
- echA19 Lipid transport and metabolism Rv3516
- clpP1 Posttranslational modification Rv2461c
- groEL1 Posttranslational modification Rv3417c
- pepA Posttranslational modification Rv0125
- dnaK Posttranslational modification Rv0350
- Replication Rv0741
- yrbE4B Secondary metabolites biosynthesis Rv3500c
- mazF9 Signal transduction mechanisms Rv2801c
- Transcription Rv0880
- Transcription Rv2669
- Transcription Rv0465c
- Transcription Rv3160c
- pth Translation Rv1014c
- Translation Rv2704

## MtbRv

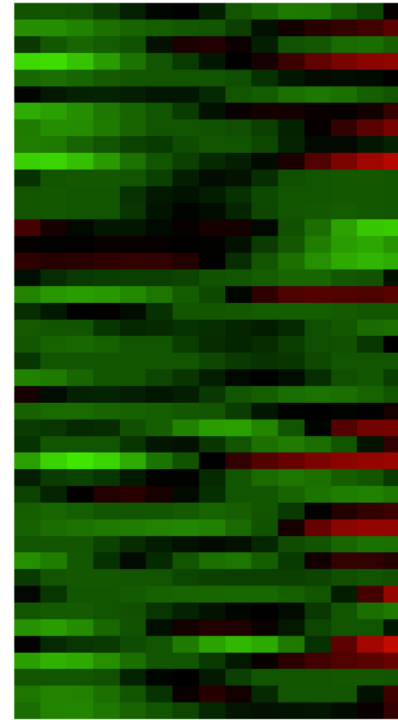

3hr  
6.5hr  
9hr  
12hr  
18.5hr  
21hr  
27hr  
31hr  
33hr  
36hr  
39.5hr  
42hr  
45.5hr  
52hr  
56hr

- sugI Carbohydrate transport and metabolism Rv3331
- vapB5 Cell cycle control Rv0626
- mptB3 CellWallbiogenesis Rv2873
- panD Coenzyme transport and metabolism Rv3601c
- glcB Energy production and conversion Rv1837c
- gabD2 Energy production and conversion Rv1731
- mshB Function unknown Rv1170
- mihF Function unknown Rv1388
- dedA Function unknown Rv2637
- Function unknown Rv2734
- Function unknown Rv1951c
- mazE5 Function unknown Rv1943c
- Function unknown Rv0611c
- Function unknown Rv2513
- PE\_PGSR60 Function unknown Rv3652
- Function unknown Rv1171
- Function unknown Rv1249c
- mgtC Function unknown Rv1811
- Function unknown Rv1875
- Function unknown Rv2219A
- Function unknown Rv2081c
- General function prediction only Rv2715
- General function prediction only Rv3034c
- General function prediction only Rv2296
- atsD Inorganic ion transport and metabolism Rv0663
- sirA Inorganic ion transport and metabolism Rv2391
- fadE4 Lipid transport and metabolism Rv0231
- fadD26 Lipid transport and metabolism Rv2930
- fadA6 Lipid transport and metabolism Rv3556c
- echA19 Lipid transport and metabolism Rv3516
- clpP1 Posttranslational modification Rv2461c
- groEL1 Posttranslational modification Rv3417c
- pepA Posttranslational modification Rv0125
- dnaK Posttranslational modification Rv0350
- Replication Rv0741
- yrbE4B Secondary metabolites biosynthesis Rv3500c
- mazF9 Signal transduction mechanisms Rv2801c
- Transcription Rv0880
- Transcription Rv2669
- Transcription Rv0465c
- Transcription Rv3160c
- pth Translation Rv1014c
- Translation Rv2704

Color Key

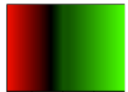

0.5 1 1.5  
Value



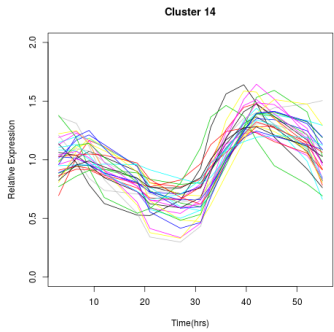

## Mtbcos

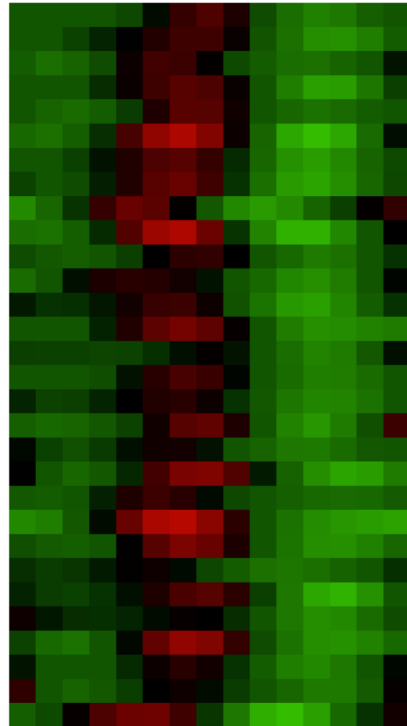

3hr  
6.5hr  
9hr  
12hr  
18.5hr  
21hr  
27hr  
31hr  
33hr  
36hr  
39.5hr  
42hr  
45.5hr  
52hr  
55hr

- mutT1 Carbohydrate transport and metabolism Rv2985
- Carbohydrate transport and metabolism Rv2135c
- mgTA CellWallbiogenesis Rv0557
- CellWallbiogenesis Rv3786c
- pncB1 Coenzyme transport and metabolism Rv1330c
- bioA Coenzyme transport and metabolism Rv1568
- cobH Coenzyme transport and metabolism Rv2065
- ribD Coenzyme transport and metabolism Rv2671
- Function unknown Rv2076c
- Function unknown Rv1590
- Function unknown Rv0910
- Function unknown Rv0965c
- Function unknown Rv1117
- Function unknown Rv1382
- vapB38 Function unknown Rv2493
- Function unknown Rv2844
- General function prediction only Rv0406c
- General function prediction only Rv0421c
- mqo General function prediction only Rv2852c
- pepR General function prediction only Rv2782c
- General function prediction only Rv3586
- engA General function prediction only Rv1713
- fecB Inorganic ion transport and metabolism Rv3044
- Lipid transport and metabolism Rv2073c
- Lipid transport and metabolism Rv0228
- htrA Posttranslational modification Rv1223
- lprN Secondary metabolites biosynthesis Rv3495c
- Transcription Rv0133
- mce1R Transcription Rv0165c
- ksgA Translation Rv1010

## MtbRv

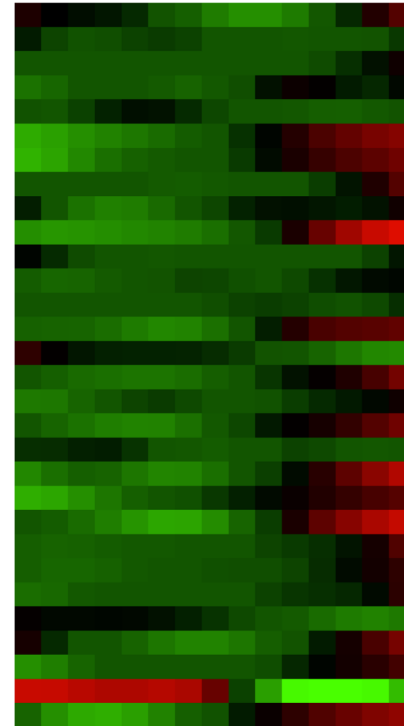

3hr  
6.5hr  
9hr  
12hr  
18.5hr  
21hr  
27hr  
31hr  
33hr  
36hr  
39.5hr  
42hr  
45.5hr  
52hr  
55hr

- mutT1 Carbohydrate transport and metabolism Rv2985
- Carbohydrate transport and metabolism Rv2135c
- mgTA CellWallbiogenesis Rv0557
- CellWallbiogenesis Rv3786c
- pncB1 Coenzyme transport and metabolism Rv1330c
- bioA Coenzyme transport and metabolism Rv1568
- cobH Coenzyme transport and metabolism Rv2065
- ribD Coenzyme transport and metabolism Rv2671
- Function unknown Rv2076c
- Function unknown Rv1590
- Function unknown Rv0910
- Function unknown Rv0965c
- Function unknown Rv1117
- Function unknown Rv1382
- vapB38 Function unknown Rv2493
- Function unknown Rv2844
- General function prediction only Rv0406c
- General function prediction only Rv0421c
- mqo General function prediction only Rv2852c
- pepR General function prediction only Rv2782c
- General function prediction only Rv3586
- engA General function prediction only Rv1713
- fecB Inorganic ion transport and metabolism Rv3044
- Lipid transport and metabolism Rv2073c
- Lipid transport and metabolism Rv0228
- htrA Posttranslational modification Rv1223
- lprN Secondary metabolites biosynthesis Rv3495c
- Transcription Rv0133
- mce1R Transcription Rv0165c
- ksgA Translation Rv1010

### Color Key

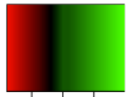

0.5 1 1.5  
Value

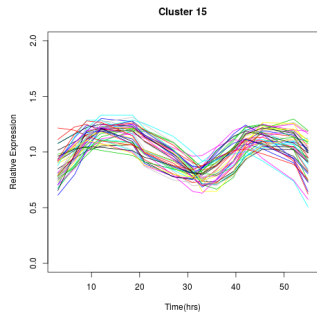

## Mtbcos

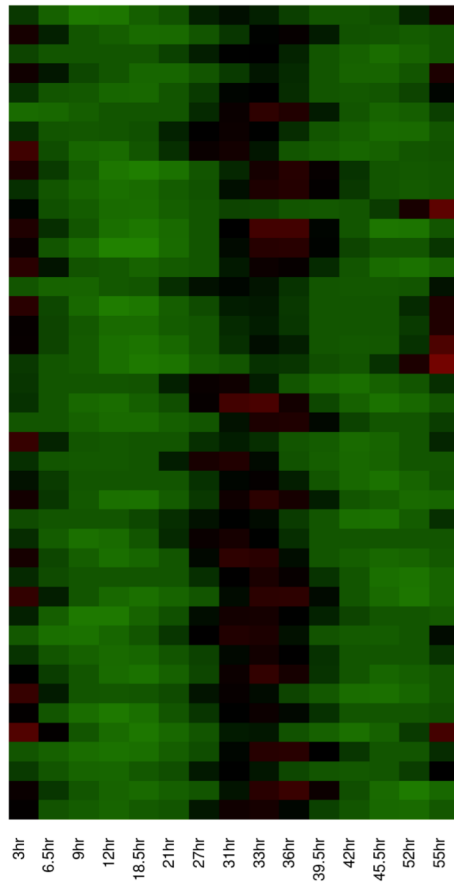

proV Amino acid transport and metabolism Rv3758c  
 trpD Amino acid transport and metabolism Rv2192c  
 asd Amino acid transport and metabolism Rv3708c  
 impA Carbohydrate transport and metabolism Rv1604  
 mrp Cell cycle control Rv1229c  
 ftsQ CellWallbiogenesis Rv2151c  
 glmS CellWallbiogenesis Rv3436c  
 cobB Coenzyme transport and metabolism Rv2848c  
 folE Coenzyme transport and metabolism Rv3609c  
 lipD Defense mechanisms Rv1923  
 - Defense mechanisms Rv1922  
 narJ Energy production and conversion Rv1163  
 - Energy production and conversion Rv2251  
 narH Energy production and conversion Rv1162  
 - Function unknown Rv1126c  
 - Function unknown Rv0460  
 - Function unknown Rv0204c  
 vapC43 Function unknown Rv2872  
 - Function unknown Rv3217c  
 - Function unknown Rv0513  
 - Function unknown Rv3256c  
 - General function prediction only Rv0906  
 mmpL2 General function prediction only Rv0507  
 - General function prediction only Rv1215c  
 - General function prediction only Rv0181c  
 cysA1 Inorganic ion transport and metabolism Rv2397c  
 viuB Inorganic ion transport and metabolism Rv2895c  
 fadA3 Lipid transport and metabolism Rv1074c  
 plsC Lipid transport and metabolism Rv2483c  
 echA5 Lipid transport and metabolism Rv0675  
 fadE9 Lipid transport and metabolism Rv0752c  
 guaB1 Nucleotide transport and metabolism Rv1843c  
 - Posttranslational modification Rv1456c  
 uvrD1 Replication Rv0949  
 polA Replication Rv1629  
 - Signal transduction mechanisms Rv0386  
 pafB Transcription Rv2096c  
 - Transcription Rv2250A  
 mshC Translation Rv2130c  
 gatB Translation Rv3009c  
 rimJ Translation Rv0995  
 me Translation Rv2444c

## MtbRv

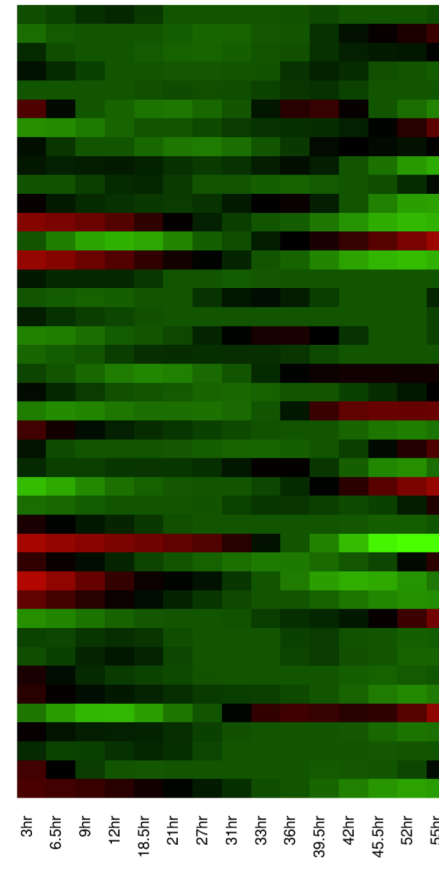

proV Amino acid transport and metabolism Rv3758c  
 trpD Amino acid transport and metabolism Rv2192c  
 asd Amino acid transport and metabolism Rv3708c  
 impA Carbohydrate transport and metabolism Rv1604  
 mrp Cell cycle control Rv1229c  
 ftsQ CellWallbiogenesis Rv2151c  
 glmS CellWallbiogenesis Rv3436c  
 cobB Coenzyme transport and metabolism Rv2848c  
 folE Coenzyme transport and metabolism Rv3609c  
 lipD Defense mechanisms Rv1923  
 - Defense mechanisms Rv1922  
 narJ Energy production and conversion Rv1163  
 - Energy production and conversion Rv2251  
 narH Energy production and conversion Rv1162  
 - Function unknown Rv1126c  
 - Function unknown Rv0460  
 - Function unknown Rv0204c  
 vapC43 Function unknown Rv2872  
 - Function unknown Rv3217c  
 - Function unknown Rv0513  
 - Function unknown Rv3256c  
 - General function prediction only Rv0906  
 mmpL2 General function prediction only Rv0507  
 - General function prediction only Rv1215c  
 - General function prediction only Rv0181c  
 cysA1 Inorganic ion transport and metabolism Rv2397c  
 viuB Inorganic ion transport and metabolism Rv2895c  
 fadA3 Lipid transport and metabolism Rv1074c  
 plsC Lipid transport and metabolism Rv2483c  
 echA5 Lipid transport and metabolism Rv0675  
 fadE9 Lipid transport and metabolism Rv0752c  
 guaB1 Nucleotide transport and metabolism Rv1843c  
 - Posttranslational modification Rv1456c  
 uvrD1 Replication Rv0949  
 polA Replication Rv1629  
 - Signal transduction mechanisms Rv0386  
 pafB Transcription Rv2096c  
 - Transcription Rv2250A  
 mshC Translation Rv2130c  
 gatB Translation Rv3009c  
 rimJ Translation Rv0995  
 me Translation Rv2444c

Color Key

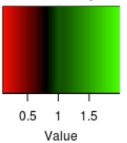

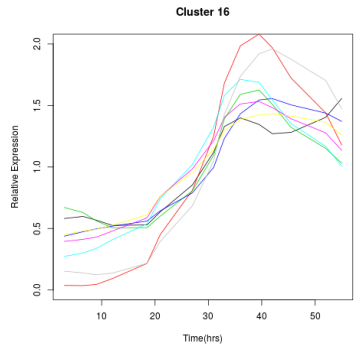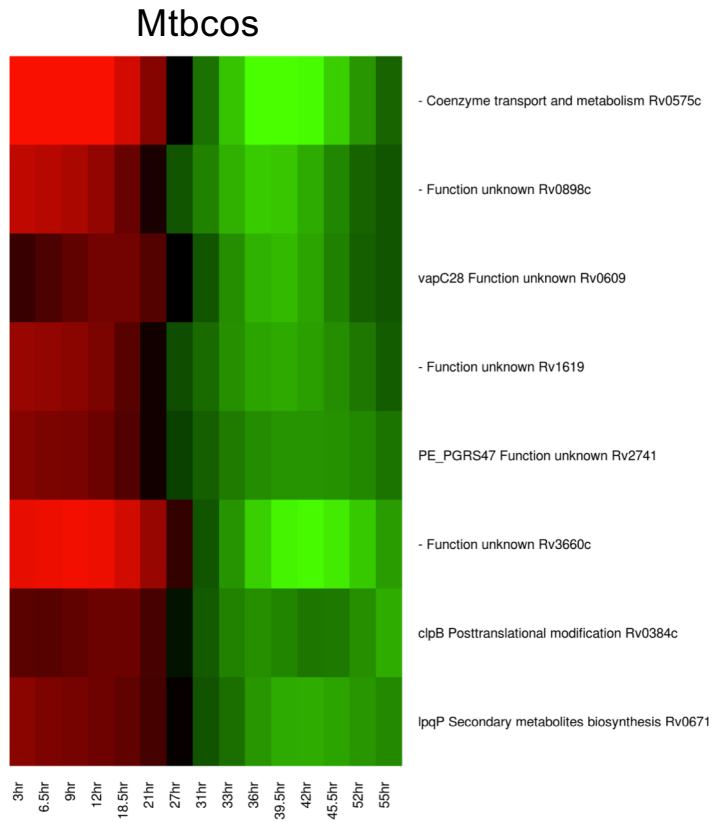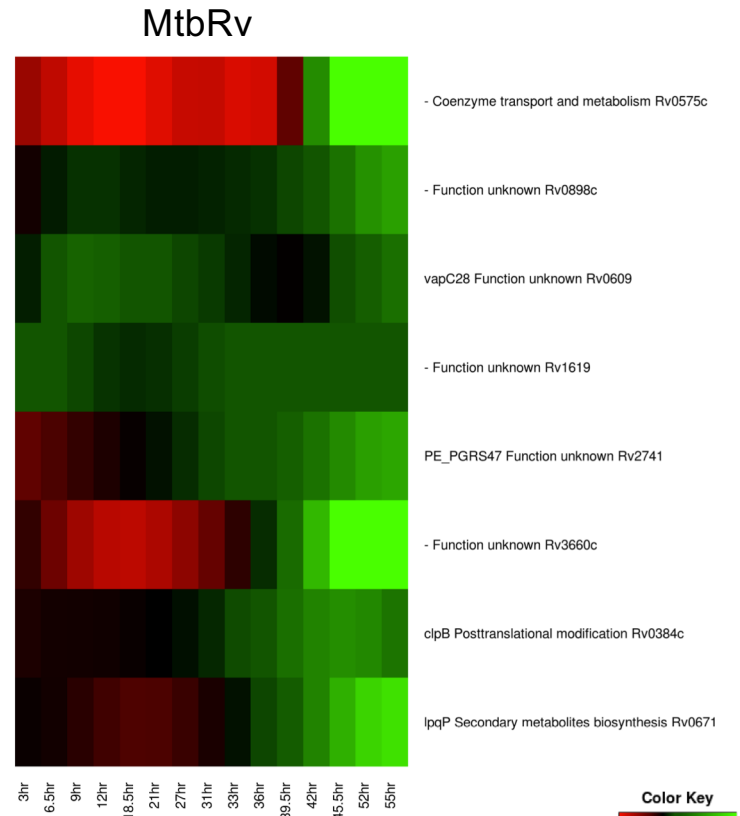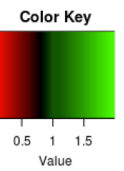

Cluster 17

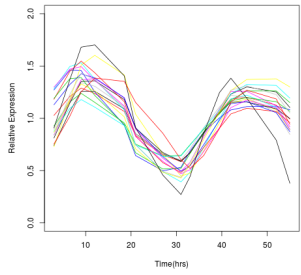

## Mtbcos

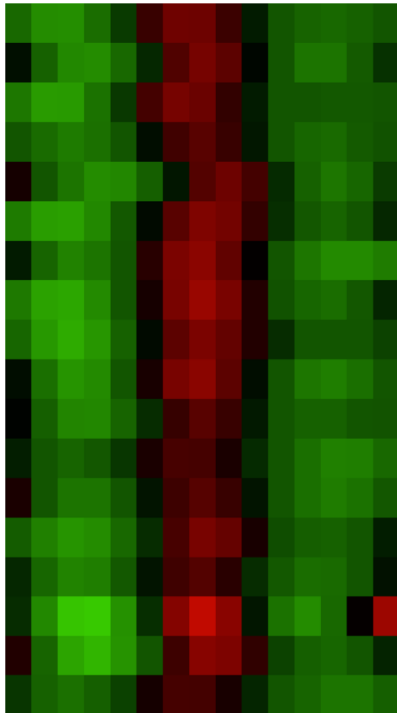

3hr 6.5hr 9hr 12hr 18.5hr 21hr 27hr 31hr 33hr 36hr 39.5hr 42hr 45.5hr 52hr 55hr

- gdh Amino acid transport and metabolism Rv2476c
- Carbohydrate transport and metabolism Rv1258c
- CellWallbiogenesis Rv0696
- hemA Coenzyme transport and metabolism Rv0509
- folK Coenzyme transport and metabolism Rv3606c
- gpdA2 Energy production and conversion Rv2982c
- nuoG Energy production and conversion Rv3151
- Function unknown Rv1069c
- Function unknown Rv2230c
- Function unknown Rv3212
- General function prediction only Rv2216
- General function prediction only Rv2781c
- ctpH Inorganic ion transport and metabolism Rv0425c
- plsB2 Lipid transport and metabolism Rv2482c
- helY Replication Rv2092c
- Secondary metabolites biosynthesis Rv3566A
- Signal transduction mechanisms Rv2028c
- Transcription Rv0674

## MtbRv

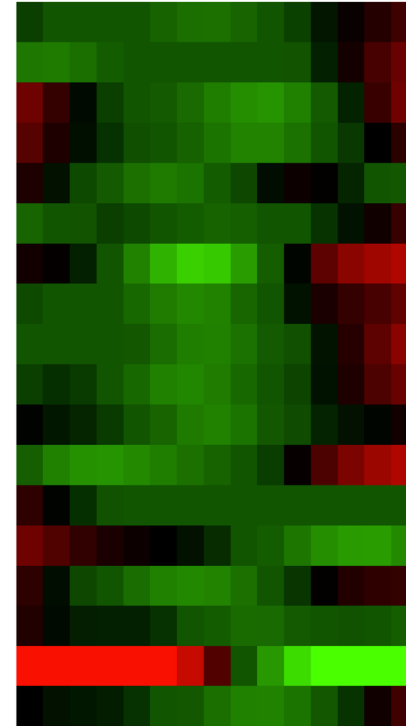

3hr 6.5hr 9hr 12hr 18.5hr 21hr 27hr 31hr 33hr 36hr 39.5hr 42hr 45.5hr 52hr 55hr

- gdh Amino acid transport and metabolism Rv2476c
- Carbohydrate transport and metabolism Rv1258c
- CellWallbiogenesis Rv0696
- hemA Coenzyme transport and metabolism Rv0509
- folK Coenzyme transport and metabolism Rv3606c
- gpdA2 Energy production and conversion Rv2982c
- nuoG Energy production and conversion Rv3151
- Function unknown Rv1069c
- Function unknown Rv2230c
- Function unknown Rv3212
- General function prediction only Rv2216
- General function prediction only Rv2781c
- ctpH Inorganic ion transport and metabolism Rv0425c
- plsB2 Lipid transport and metabolism Rv2482c
- helY Replication Rv2092c
- Secondary metabolites biosynthesis Rv3566A
- Signal transduction mechanisms Rv2028c
- Transcription Rv0674

Color Key

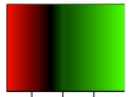

0.5 1 1.5  
Value

Cluster 18

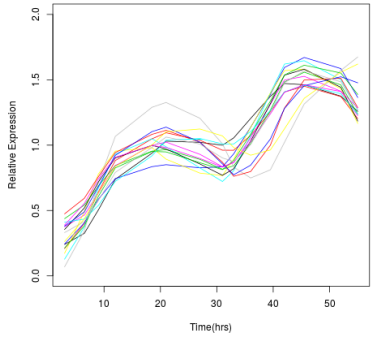

### Mtbcos

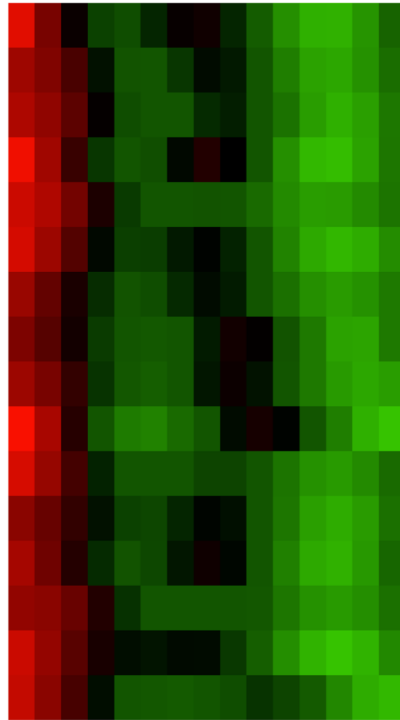

3hr 6.5hr 9hr 12hr 18.5hr 21hr 27hr 31hr 33hr 36hr 39.5hr 42hr 45.5hr 52hr 55hr

- argC Amino acid transport and metabolism Rv1652
- Carbohydrate transport and metabolism Rv1634
- mesJ Cell cycle control Rv3625c
- cydD Energy production and conversion Rv1621c
- Function unknown Rv0441c
- PE\_PGRS39 Function unknown Rv2340c
- lpqB Function unknown Rv3244c
- mazF7 Function unknown Rv2063A
- Function unknown Rv2372c
- mctB Function unknown Rv1698
- General function prediction only Rv0597c
- General function prediction only Rv0959
- narK2 Inorganic ion transport and metabolism Rv1737
- dnaJ2 Posttranslational modification Rv2373c
- Replication Rv1278
- Replication Rv3386

### MtbRv

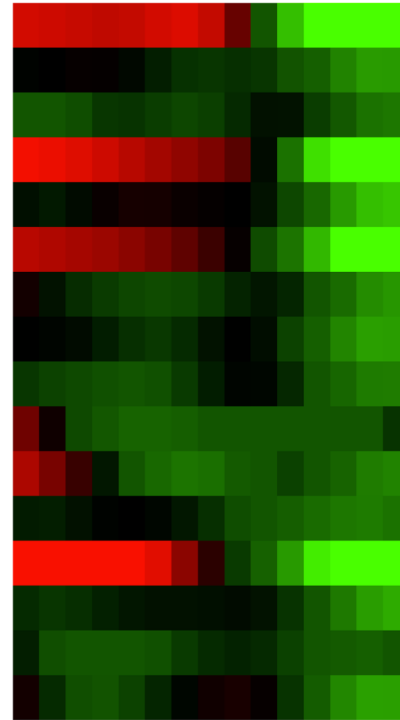

3hr 6.5hr 9hr 12hr 18.5hr 21hr 27hr 31hr 33hr 36hr 39.5hr 42hr 45.5hr 52hr 55hr

- argC Amino acid transport and metabolism Rv1652
- Carbohydrate transport and metabolism Rv1634
- mesJ Cell cycle control Rv3625c
- cydD Energy production and conversion Rv1621c
- Function unknown Rv0441c
- PE\_PGRS39 Function unknown Rv2340c
- lpqB Function unknown Rv3244c
- mazF7 Function unknown Rv2063A
- Function unknown Rv2372c
- mctB Function unknown Rv1698
- General function prediction only Rv0597c
- General function prediction only Rv0959
- narK2 Inorganic ion transport and metabolism Rv1737c
- dnaJ2 Posttranslational modification Rv2373c
- Replication Rv1278
- Replication Rv3386

Color Key



0.5 1 1.5  
Value
